# Supplementary material
Source: publisher figshare collection journal article supplement (https://gsapubs.figshare.com/ndownloader/files/23316278)
Supplement: Supplementary file 1 [file 23316278]

## Sheet: EMP. Oxford (S-19 + PR)
Date of analysis	Outcrop/Site	Sample	Sample Ana.	Strat. Pos.	Ana. Total	SiO2	TiO2	Al2O3	FeOt	MnO	MgO	CaO	Na2O	K2O	P2O5	Cl
24.06.15	S19	22.90m/Eruptive unit 3	S-19_22.9_11B_1	Y3	98.0418	59.7497	0.3647	18.7626	3.7424	0.1508	0.9186	2.7526	2.9403	10.0696	0.1519	0.3969	100
24.06.15	S19	22.90m/Eruptive unit 3	S-19_22.9_11B_2	Y3	96.5402	60.3523	0.3782	18.5321	3.5659	0.0053	0.8333	2.8694	2.859	10.0354	0.1964	0.3728	100
24.06.15	S19	22.90m/Eruptive unit 3	S-19_22.9_12B_1	Y3	94.3618	61.9571	0.3567	18.4094	2.6238	0.0658	0.4599	2.2351	3.9613	9.1349	0.0649	0.731	99.9999
24.06.15	S19	22.90m/Eruptive unit 3	S-19_22.9_14B_1	Y3	96.679	62.0534	0.2979	18.1551	2.9455	0.1497	0.3201	2.135	4.4841	8.4244	0.0658	0.969	100
24.06.15	S19	22.90m/Eruptive unit 3	S-19_22.9_14B_2	Y3	95.0714	62.3964	0.3566	18.2201	2.5762	0.189	0.3247	2.0708	4.3025	8.5485	0.0649	0.9504	100
24.06.15	S19	22.90m/Eruptive unit 3	S-19_22.9_15B_1	Y3	97.4418	61.7081	0.3552	18.2732	2.8989	0.1886	0.4717	2.1728	4.0731	8.9959	0.0987	0.7638	100
24.06.15	S19	22.90m/Eruptive unit 3	S-19_22.9_20C_1	Y3	94.6849	61.6119	0.3794	18.0987	2.9375	0.1389	0.4357	2.2222	4.5458	8.8515	0.0879	0.6906	100
24.06.15	S19	22.90m/Eruptive unit 3	S-19_22.9_23C_1	Y3	98.3962	62.0832	0.3655	18.4104	2.6585	0.0558	0.4298	2.2372	4.1539	8.8343	0.0423	0.7292	100
24.06.15	S19	22.90m/Eruptive unit 3	S-19_22.9_23C_2	Y3	97.9236	62.1135	0.375	18.2188	2.915	0.1428	0.438	2.188	3.912	8.9791	0	0.7177	99.9999
24.06.15	S19	22.90m/Eruptive unit 3	S-19_22.9_24C_1	Y3	97.3433	60.6989	0.4237	18.7255	3.2885	0.0715	0.6323	2.4626	3.1452	9.9288	0.1519	0.4712	100
24.06.15	S19	22.90m/Eruptive unit 3	S-19_22.9_24C_2	Y3	96.1488	60.7113	0.4076	18.5292	3.4169	0.0439	0.7607	2.4465	3.2988	9.7731	0.1533	0.4587	100
24.06.15	S19	22.90m/Eruptive unit 3	S-19_22.9_24C_3	Y3	97.4867	60.6865	0.3711	18.7349	3.1558	0.1234	0.6607	2.5052	3.3318	9.8849	0.0952	0.4504	99.9999
24.06.15	S19	22.90m/Eruptive unit 3	S-19_22.9_25D_1	Y3	94.2951	62.3293	0.3853	18.1601	2.8022	0.1774	0.3759	2.1852	4.0734	8.6503	0	0.8609	100
24.06.15	S19	22.90m/Eruptive unit 3	S-19_22.9_26D_1	Y3	98.6551	60.3684	0.397	18.5141	3.6603	0.0298	0.7525	2.6248	3.2375	9.8408	0.1433	0.4313	99.9998
24.06.15	S19	22.90m/Eruptive unit 3	S-19_22.9_28D_1	Y3	96.1251	61.8217	0.3614	18.3272	3.0043	0.066	0.5383	2.3207	3.9818	8.7612	0.093	0.7245	100
24.06.15	S19	22.90m/Eruptive unit 3	S-19_22.9_29D_1	Y3	95.3665	60.5467	0.3558	18.4625	3.3594	0.1396	0.7713	2.654	3.158	10.0109	0.134	0.4079	100
24.06.15	S19	22.90m/Eruptive unit 3	S-19_22.9_30D_1	Y3	94.5039	60.5691	0.376	18.4175	3.313	0.0641	0.7286	2.4325	3.4289	10.0452	0.1499	0.4751	99.9999
24.06.15	S19	22.90m/Eruptive unit 3	S-19_22.9_30D_2	Y3	96.1179	60.5937	0.3204	18.5553	3.3046	0.1188	0.6739	2.508	3.5609	9.7365	0.142	0.4859	100
24.06.15	S19	22.90m/Eruptive unit 3	S-19_22.9_32D_1	Y3	97.9371	60.7022	0.3506	18.6334	3.3802	0.1113	0.6632	2.5197	3.2283	9.865	0.111	0.4351	100
24.06.15	S19	22.90m/Eruptive unit 3	S-19_22.9_33E_1	Y3	97.414	62.0752	0.3997	18.2046	2.9295	0.1776	0.4361	2.1524	3.9982	8.8102	0.1322	0.6844	100
24.06.15	S19	22.90m/Eruptive unit 3	S-19_22.9_34E_2	Y3	94.2073	62.0044	0.428	18.1854	3.0456	0.1357	0.3754	2.2202	3.8397	8.9925	0.0892	0.6838	99.9999
24.06.15	S19	22.90m/Eruptive unit 3	S-19_22.9_36E_2	Y3	96.5118	62.0077	0.3199	18.1954	2.8294	0.1345	0.4832	2.1247	4.4022	8.6752	0.0693	0.7587	100
24.06.15	S19	22.90m/Eruptive unit 3	S-19_22.9_37E_1	Y3	94.1495	62.1001	0.4193	18.093	2.9382	0.068	0.4748	2.2015	3.7892	9.1782	0.0486	0.6891	100
24.06.15	S19	22.90m/Eruptive unit 3	S-19_22.9_38E_1	Y3	96.3898	61.8423	0.415	18.2544	2.8451	0.1602	0.5296	2.196	3.8461	9.1246	0.1016	0.6851	100
24.06.15	S19	22.90m/Eruptive unit 3	S-19_22.9_4A_1	Y3	96.3363	60.3211	0.4441	18.4712	3.5918	0.0934	0.795	2.6121	3.1521	9.9238	0.1491	0.4464	100
24.06.15	S19	22.90m/Eruptive unit 3	S-19_22.9_4A_2	Y3	97.3185	60.1671	0.3552	18.508	3.5001	0.1728	0.7554	2.5756	3.2259	10.1111	0.191	0.4378	100
24.06.15	S19	22.90m/Eruptive unit 3	S-19_22.9_4A_3	Y3	97.1498	60.3887	0.3702	18.6422	3.5569	0.119	0.8496	2.6269	2.9507	9.9526	0.1763	0.367	100
24.06.15	S19	22.90m/Eruptive unit 3	S-19_22.9_9B_1	Y3	94.8992	61.9161	0.3054	18.2544	3.0215	0.152	0.4942	2.2639	3.9118	8.9641	0.0369	0.6797	100
24.06.15	S19	22.90m/Eruptive unit 3	S-19_22.9_9B_2	Y3	92.8495	62.1074	0.3432	18.3925	2.9947	0.0351	0.4507	2.1805	3.8775	8.8291	0.0558	0.7334	99.9999
24.06.15	S19	25.80m/Eruptive unit 3	S-19_25.8_10B_1	Y3	98.9719	60.0343	0.3699	18.7362	3.6636	0.1689	0.7606	2.5404	2.8356	10.31	0.1884	0.392	99.9999
24.06.15	S19	25.80m/Eruptive unit 3	S-19_25.8_10B_2	Y3	98.4365	59.9498	0.3827	18.7211	3.6368	0.0791	0.8093	2.8032	2.8295	10.1777	0.2319	0.3788	99.9999
24.06.15	S19	25.80m/Eruptive unit 3	S-19_25.8_11B_1	Y3	97.5267	60.2274	0.4103	18.6257	3.596	0.1748	0.8503	2.5925	2.9361	9.9709	0.1605	0.4554	99.9999
24.06.15	S19	25.80m/Eruptive unit 3	S-19_25.8_12B_1	Y3	98.1203	62.1256	0.3454	18.1454	2.9242	0.0626	0.4266	2.1261	4.4805	8.3863	0.0493	0.928	100
24.06.15	S19	25.80m/Eruptive unit 3	S-19_25.8_12B_2	Y3	98.2853	62.2488	0.3275	18.1726	2.7212	0.0611	0.3416	2.1324	4.713	8.3704	0.0073	0.9041	100
24.06.15	S19	25.80m/Eruptive unit 3	S-19_25.8_13B_1	Y3	99.0533	58.8669	0.5807	17.3649	3.9787	0.1729	1.7947	4.9078	3.9916	7.3628	0.2103	0.7688	100
24.06.15	S19	25.80m/Eruptive unit 3	S-19_25.8_13B_2	Y3	97.8897	60.1384	0.4521	18.1952	3.6293	0.1195	0.7945	2.7782	4.4344	8.3494	0.2265	0.8825	100
24.06.15	S19	25.80m/Eruptive unit 3	S-19_25.8_14B_1	Y3	98.4054	59.7544	0.5026	18.4492	3.717	0.1289	0.9778	3.2865	4.1168	7.9858	0.2235	0.8575	100
24.06.15	S19	25.80m/Eruptive unit 3	S-19_25.8_15B_1	Y3	96.7749	60.042	0.3825	18.7105	3.3753	0.1479	0.7616	2.7008	3.3173	9.9772	0.1407	0.4442	100
24.06.15	S19	25.80m/Eruptive unit 3	S-19_25.8_16B_1	Y3	94.9294	61.6023	0.4011	18.1168	3.0117	0.1569	0.5501	2.3871	4.2141	8.6199	0.0515	0.8884	99.9999
24.06.15	S19	25.80m/Eruptive unit 3	S-19_25.8_17C_1	Y3	98.2564	60.8508	0.4616	18.2817	3.1774	0.1297	0.6864	2.8267	4.3833	8.2611	0.1137	0.8276	100
24.06.15	S19	25.80m/Eruptive unit 3	S-19_25.8_18C_1	Y3	96.3102	62.2542	0.3284	18.0492	2.9458	0.0946	0.4006	2.0382	4.3341	8.6016	0.0578	0.8955	100
24.06.15	S19	25.80m/Eruptive unit 3	S-19_25.8_18C_2	Y3	95.7959	62.0959	0.3676	18.283	2.7921	0.1028	0.3732	2.1643	4.1464	8.6454	0.0653	0.964	100
24.06.15	S19	25.80m/Eruptive unit 3	S-19_25.8_19C_1	Y3	95.7102	60.4622	0.3662	18.6784	3.5366	0.064	0.772	2.5259	2.8752	10.1047	0.1821	0.4327	100
24.06.15	S19	25.80m/Eruptive unit 3	S-19_25.8_19C_2	Y3	94.5611	60.2641	0.3972	18.6913	3.3955	0.0594	0.7814	2.5735	3.0414	10.2285	0.1318	0.4359	100
24.06.15	S19	25.80m/Eruptive unit 3	S-19_25.8_20C_1	Y3	96.1015	62.3434	0.3242	18.2399	2.5646	0.0439	0.4153	2.1111	4.5461	8.5268	0.0424	0.8423	100
24.06.15	S19	25.80m/Eruptive unit 3	S-19_25.8_21C_1	Y3	98.7424	60.3334	0.3854	18.4354	3.4988	0.1565	0.7453	2.5929	3.1179	10.0651	0.2241	0.4452	100
24.06.15	S19	25.80m/Eruptive unit 3	S-19_25.8_21C_2	Y3	98.5712	60.1576	0.3936	18.6534	3.3624	0.1175	0.7324	2.6352	3.0778	10.2105	0.1985	0.4611	100
24.06.15	S19	25.80m/Eruptive unit 3	S-19_25.8_23C_1	Y3	98.0047	58.2069	0.5035	18.5926	4.118	0.0985	1.3793	4.0096	3.9576	7.9274	0.3653	0.8414	100
24.06.15	S19	25.80m/Eruptive unit 3	S-19_25.8_23C_2	Y3	97.0475	59.4144	0.4905	18.4492	3.7492	0.125	1.0636	3.5721	3.9986	8.0519	0.2526	0.833	100
24.06.15	S19	25.80m/Eruptive unit 3	S-19_25.8_24C_1	Y3	98.3366	59.9682	0.5055	18.2502	3.6391	0.0493	0.9492	3.1563	4.2038	8.1705	0.2588	0.849	99.9999
24.06.15	S19	25.80m/Eruptive unit 3	S-19_25.8_25D_1	Y3	94.8019	62.1248	0.4155	18.1747	2.7666	0.2166	0.3411	2.0756	4.5639	8.2776	0.0632	0.9804	100
24.06.15	S19	25.80m/Eruptive unit 3	S-19_25.8_27D_1	Y3	98.5454	62.1743	0.3559	18.246	2.7652	0.1298	0.3681	2.0329	4.497	8.4338	0.1009	0.8962	100
24.06.15	S19	25.80m/Eruptive unit 3	S-19_25.8_28D_1	Y3	96.5905	62.2849	0.4168	18.0475	2.7815	0.1174	0.3848	2.1311	4.3465	8.4427	0.0574	0.9894	100
24.06.15	S19	25.80m/Eruptive unit 3	S-19_25.8_29D_1	Y3	96.3471	62.4469	0.4398	18.2588	2.8169	0.1436	0.4069	2.11	4.1289	8.3972	0.0439	0.8071	100
24.06.15	S19	25.80m/Eruptive unit 3	S-19_25.8_2A_1	Y3	96.7026	62.3686	0.3537	18.1236	2.8197	0.2192	0.3384	2.1085	4.4143	8.404	0.08	0.77	100
24.06.15	S19	25.80m/Eruptive unit 3	S-19_25.8_31D_1	Y3	93.2745	62.1006	0.3471	18.0526	2.842	0.2286	0.4316	2.0954	4.3271	8.5457	0.0226	1.0065	99.9998
24.06.15	S19	25.80m/Eruptive unit 3	S-19_25.8_32D_1	Y3	97.5299	61.9693	0.3987	18.1175	2.7494	0.1371	0.4338	2.2202	4.4132	8.5876	0.0783	0.8947	99.9998
24.06.15	S19	25.80m/Eruptive unit 3	S-19_25.8_4A_1	Y3	94.7623	62.121	0.3416	17.9479	2.6772	0.1961	0.4139	2.1576	4.5953	8.5923	0.0459	0.9112	100
24.06.15	S19	25.80m/Eruptive unit 3	S-19_25.8_6A_1	Y3	97.5598	61.922	0.3312	18.3111	2.933	0.118	0.3935	2.2458	4.3012	8.4068	0.1408	0.8966	100
24.06.15	S19	25.80m/Eruptive unit 3	S-19_25.8_6A_2	Y3	98.6571	61.7084	0.3167	18.127	3.0281	0.162	0.4639	2.1474	4.5844	8.44	0.1069	0.9152	100
24.06.15	S19	25.80m/Eruptive unit 3	S-19_25.8_6A_3	Y3	97.5189	62.1863	0.365	18.1769	2.9247	0.1803	0.4228	2.2269	4.0213	8.4802	0.0615	0.9543	100
24.06.15	S19	25.80m/Eruptive unit 3	S-19_25.8_8A_1	Y3	95.114	62.0323	0.4225	18.2269	2.889	0.1317	0.3786	2.2035	4.3309	8.3784	0.0576	0.9487	100
24.06.15	S19	25.80m/Eruptive unit 3	S-19_25.8_8A_2	Y3	94.8186	61.9496	0.4093	18.0275	2.8703	0.1242	0.4447	2.1997	4.4498	8.5448	0.1043	0.8758	100
24.06.15	S19	25.80m/Eruptive unit 3	S-19_25.8_9B_1	Y3	94.5448	60.5858	0.365	18.6202	3.3295	0.1199	0.6189	2.5478	3.5621	9.7152	0.0882	0.4474	100
24.06.15	S19	25.80m/Eruptive unit 3	S-19_25.8_A1	Y3	95.3502	61.8079	0.3622	18.3542	2.8052	0.1918	0.3906	2.1589	4.2904	8.7362	0.0798	0.8227	99.9999
24.06.15	S19	25.80m/Eruptive unit 3	S-19_25.8_A2	Y3	94.251	62.1788	0.375	18.2596	2.8295	0.114	0.4284	2.1602	4.2529	8.4844	0.0882	0.8292	100
14.02.14	P.Rosi	CF132/Eruptive unit 4	CF132_1	Post-CI	92.2805	62.4605	0.372668	17.943	2.85467	0.239379	0.442564	2.0468	4.13305	8.65156	0.05104	0.80472	100
14.02.14	P.Rosi	CF132/Eruptive unit 4	CF132_10	Post-CI	93.0595	62.8167	0.366755	17.8432	2.78284	0.0624332	0.383626	2.14143	4.20677	8.52917	0.0609288	0.806151	100
14.02.14	P.Rosi	CF132/Eruptive unit 4	CF132_11	Post-CI	93.9737	62.7655	0.389258	18.0056	2.88666	0.0573565	0.3883	2.09931	4.25491	8.34755	0.0560795	0.749465	100
25.02.14	P.Rosi	CF132/Eruptive unit 4	CF132_11B_1	Post-CI	95.3916	62.3236	0.398987	18.02	2.63965	0.233878	0.438508	2.09075	4.62923	8.39634	0.0467546	0.782249	100
25.02.14	P.Rosi	CF132/Eruptive unit 4	CF132_13B_2	Post-CI	94.4841	62.3714	0.363447	17.8426	2.84408	0.0990643	0.381652	2.17529	4.62395	8.48407	0.0381016	0.776321	100
14.02.14	P.Rosi	CF132/Eruptive unit 4	CF132_14	Post-CI	96.5266	62.358	0.396678	17.8863	2.88459	0.130638	0.41056	2.12936	4.5834	8.32972	0.0198909	0.870848	100
25.02.14	P.Rosi	CF132/Eruptive unit 4	CF132_14B_1	Post-CI	93.9725	62.4834	0.358083	18.0428	2.82636	0.12908	0.348187	2.03581	4.35893	8.50047	0.0852377	0.831626	100
14.02.14	P.Rosi	CF132/Eruptive unit 4	CF132_15	Post-CI	97.6078	60.209	0.491149	18.0542	3.7079	0.155315	0.995617	3.19052	4.31195	7.9342	0.174986	0.775143	100
25.02.14	P.Rosi	CF132/Eruptive unit 4	CF132_15B_1	Post-CI	94.73	62.4038	0.373377	18.0149	2.94637	0.130265	0.398395	2.11823	4.35121	8.37718	0.108941	0.777367	100
14.02.14	P.Rosi	CF132/Eruptive unit 4	CF132_16	Post-CI	93.8591	62.4816	0.390905	18.072	2.99854	0.051247	0.421483	2.03347	4.42664	8.16831	0.0567872	0.899007	100
14.02.14	P.Rosi	CF132/Eruptive unit 4	CF132_17	Post-CI	96.9619	61.8875	0.330027	18.233	3.00871	0.142015	0.445433	2.22778	4.5357	8.34699	0.107052	0.735753	100
14.02.14	P.Rosi	CF132/Eruptive unit 4	CF132_18	Post-CI	97.7484	59.6858	0.465685	17.1709	3.96661	0.186192	1.80392	4.76253	3.7794	7.35981	0.160923	0.65822	100
14.02.14	P.Rosi	CF132/Eruptive unit 4	CF132_19	Post-CI	97.5577	62.2993	0.362042	18.129	2.94205	0.154063	0.405914	2.08492	4.47756	8.33814	0.043974	0.763036	100
25.02.14	P.Rosi	CF132/Eruptive unit 4	CF132_1A_1	Post-CI	95.0136	62.722	0.399522	18.1625	2.6493	0.0307324	0.366895	2.0416	4.21603	8.60971	0.000105248	0.801675	100
14.02.14	P.Rosi	CF132/Eruptive unit 4	CF132_23	Post-CI	93.1712	62.7554	0.305459	17.9162	2.68914	0.0784577	0.397762	2.11632	4.38065	8.43125	0.0846828	0.844682	100
14.02.14	P.Rosi	CF132/Eruptive unit 4	CF132_24	Post-CI	93.7712	62.6146	0.362585	17.9665	2.74615	0.0601464	0.336884	2.1368	4.64172	8.30202	0.0255942	0.806964	100
14.02.14	P.Rosi	CF132/Eruptive unit 4	CF132_3	Post-CI	98.3254	57.8323	0.668698	16.3343	4.44453	0.135469	2.71354	6.70702	3.70596	6.63969	0.174929	0.643577	100
25.02.14	P.Rosi	CF132/Eruptive unit 4	CF132_4A_1	Post-CI	94.6558	62.2689	0.405997	18.1366	2.83121	0.129733	0.368176	2.11028	4.26133	8.61521	0.0517665	0.820869	100
14.02.14	P.Rosi	CF132/Eruptive unit 4	CF132_5	Post-CI	93.0192	62.3544	0.374654	18.0319	2.83329	0.120405	0.404433	2.06947	4.41081	8.47459	0.11202	0.814025	100
25.02.14	P.Rosi	CF132/Eruptive unit 4	CF132_6A_2	Post-CI	95.1417	60.4147	0.357467	18.6019	3.5959	0.0954366	0.758237	2.64994	2.63691	10.3285	0.166173	0.39478	100
25.02.14	P.Rosi	CF132/Eruptive unit 4	CF132_7A_1	Post-CI	93.5785	62.2817	0.416656	18.0301	2.79829	0.106007	0.410137	2.11544	4.41971	8.53455	0.0782231	0.80916	100
14.02.14	P.Rosi	CF132/Eruptive unit 4	CF132_9	Post-CI	93.2881	62.1256	0.304969	18.0059	2.7965	0.114698	0.444537	2.1261	4.54431	8.62286	0.106873	0.807606	100
25.02.14	P.Rosi	CF132/Eruptive unit 4	CF132_9B_2	Post-CI	97.8276	62.5442	0.425033	18.0026	2.80166	0.180726	0.384145	2.08019	4.37627	8.34734	0.0688967	0.788939	100
25.02.14	P.Rosi	CF132/Eruptive unit 4	CF132_9B_3	Post-CI	96.6002	62.2346	0.349689	18.0132	2.87908	0.103623	0.351552	2.12381	4.47308	8.51686	0.0811593	0.873394	100
14.02.14	P.Rosi	CF132/Eruptive unit 4	CF132_9B_4	Post-CI	92.6724	60.8669	0.389652	18.4464	3.50914	0.110928	0.725998	2.51618	3.06208	9.86291	0.113194	0.396666	100
25.02.14	P.Rosi	CF131/Eruptive unit 4	CF131_10B_1	Post-CI	97.6248	60.8652	0.447018	18.3346	3.45025	0.116569	0.623714	2.51452	4.425	8.3237	0.170551	0.728913	100
25.02.14	P.Rosi	CF131/Eruptive unit 4	CF131_10B_2	Post-CI	98.2865	59.8361	0.546464	17.3764	3.84865	0.128909	1.42085	4.07319	4.18603	7.75407	0.103473	0.725837	100
25.02.14	P.Rosi	CF131/Eruptive unit 4	CF131_11B_1	Post-CI	98.1611	62.3717	0.275466	18.2664	2.68976	0.131111	0.353602	2.13781	4.34123	8.66362	0.0612259	0.708122	100
25.02.14	P.Rosi	CF131/Eruptive unit 4	CF131_11B_2	Post-CI	96.82	62.2555	0.39434	18.1048	2.80985	0.132824	0.403636	2.13551	4.52851	8.31812	0.120223	0.796633	100
25.02.14	P.Rosi	CF131/Eruptive unit 4	CF131_11B_3	Post-CI	96.5773	62.2903	0.359712	17.9851	3.08654	0.12125	0.396781	1.97634	4.63038	8.24469	0.0680284	0.840881	100
25.02.14	P.Rosi	CF131/Eruptive unit 4	CF131_12B_1	Post-CI	99.2411	62.1445	0.347134	18.0461	2.92681	0.135932	0.412228	2.10447	4.41279	8.63896	0.0556221	0.775485	100
25.02.14	P.Rosi	CF131/Eruptive unit 4	CF131_13C_1	Post-CI	98.2088	60.9795	0.428068	18.0581	3.42648	0.108544	0.852673	2.91542	4.02398	8.20344	0.180941	0.822941	100
25.02.14	P.Rosi	CF131/Eruptive unit 4	CF131_15C_1	Post-CI	95.3177	60.8353	0.481023	18.1952	3.47291	0.087392	0.667032	2.76738	4.37002	8.15997	0.171846	0.791983	100
25.02.14	P.Rosi	CF131/Eruptive unit 4	CF131_15C_2	Post-CI	96.0971	62.0894	0.349126	18.2641	2.74868	0.113219	0.406048	2.46532	4.02634	8.81234	0.0751323	0.65028	100
25.02.14	P.Rosi	CF131/Eruptive unit 4	CF131_16C_1	Post-CI	95.7334	62.2119	0.39234	18.0819	2.77343	0.162012	0.453133	2.21072	4.52371	8.33147	0.0755222	0.783843	100
25.02.14	P.Rosi	CF131/Eruptive unit 4	CF131_16C_2	Post-CI	94.9868	62.0491	0.382369	18.1918	2.88019	0.113068	0.425638	2.1564	4.55695	8.35127	0.078432	0.814745	100
25.02.14	P.Rosi	CF131/Eruptive unit 4	CF131_16C_3	Post-CI	96.1977	62.0205	0.400529	18.0565	3.03396	0.160919	0.426621	2.15151	4.43857	8.39656	0.11757	0.796797	100
25.02.14	P.Rosi	CF131/Eruptive unit 4	CF131_17C_1	Post-CI	95.2148	60.8241	0.478392	18.2408	3.27292	0.151132	0.743582	2.90407	4.17383	8.24945	0.163	0.798825	100
25.02.14	P.Rosi	CF131/Eruptive unit 4	CF131_17C_2	Post-CI	96.1834	61.4285	0.412337	18.1966	3.16957	0.0775602	0.659261	2.58475	4.1268	8.4053	0.159383	0.779968	100
25.02.14	P.Rosi	CF131/Eruptive unit 4	CF131_17C_3	Post-CI	97.0313	60.4961	0.457275	18.2238	3.54556	0.095227	0.733269	2.89638	4.25729	8.327	0.184167	0.783871	100
25.02.14	P.Rosi	CF131/Eruptive unit 4	CF131_19D_1	Post-CI	95.1349	62.6489	0.367794	18.1276	2.54134	0.121722	0.381143	1.93725	4.43906	8.64499	0.0811479	0.708993	100
25.02.14	P.Rosi	CF131/Eruptive unit 4	CF131_19D_2	Post-CI	97.6295	60.3572	0.363415	17.752	3.66426	0.0946435	1.23026	3.52701	4.05164	8.02411	0.222371	0.713104	100
25.02.14	P.Rosi	CF131/Eruptive unit 4	CF131_1A_1	Post-CI	98.0467	61.5813	0.327293	18.6996	2.64374	0.0705786	0.466818	2.3089	3.71445	9.65703	0.0486503	0.481709	100
25.02.14	P.Rosi	CF131/Eruptive unit 4	CF131_1A_2	Post-CI	99.0409	61.6744	0.220111	18.8026	2.80379	0.0219101	0.44628	2.27704	3.45554	9.65884	0.107632	0.5318	100
25.02.14	P.Rosi	CF131/Eruptive unit 4	CF131_1A_3	Post-CI	98.1667	61.1822	0.370288	18.281	3.34187	0.204448	0.573412	2.35874	3.78041	9.14047	0.133039	0.634125	100
25.02.14	P.Rosi	CF131/Eruptive unit 4	CF131_20D_1	Post-CI	98.3082	59.2932	0.518472	17.3068	3.63652	0.154718	1.7553	4.72219	4.16211	7.51067	0.196423	0.74358	100
25.02.14	P.Rosi	CF131/Eruptive unit 4	CF131_20D_2	Post-CI	93.6342	61.4456	0.379028	18.2585	3.13198	0.191383	0.595616	2.52995	4.39989	8.18002	0.114168	0.773863	100
25.02.14	P.Rosi	CF131/Eruptive unit 4	CF131_22D_1	Post-CI	94.5174	62.4747	0.35422	17.9097	2.77018	0.246621	0.385537	2.02936	4.61005	8.40184	0.0317402	0.785993	100
25.02.14	P.Rosi	CF131/Eruptive unit 4	CF131_22D_2	Post-CI	94.5438	62.6686	0.378343	18.0156	2.65739	0.121319	0.386382	1.92768	4.6608	8.3061	0.0618761	0.815918	100
25.02.14	P.Rosi	CF131/Eruptive unit 4	CF131_23D_1	Post-CI	99.8637	62.2484	0.331251	18.302	2.72972	0.164224	0.358789	2.28231	4.53308	8.20829	0.0930268	0.748821	100
25.02.14	P.Rosi	CF131/Eruptive unit 4	CF131_23D_2	Post-CI	98.1226	61.945	0.393385	18.2424	2.87548	0.187826	0.467578	2.27338	4.45962	8.26446	0.0656322	0.825294	100
25.02.14	P.Rosi	CF131/Eruptive unit 4	CF131_24D_1	Post-CI	97.016	62.0735	0.38705	18.0934	2.91972	0.133895	0.42962	2.20994	4.63295	8.24627	0.0988497	0.774821	100
25.02.14	P.Rosi	CF131/Eruptive unit 4	CF131_24D_2	Post-CI	94.3971	62.2035	0.383486	18.0507	2.91238	0.159645	0.429462	2.33948	4.30787	8.41731	0.104982	0.691229	100
25.02.14	P.Rosi	CF131/Eruptive unit 4	CF131_25E_1	Post-CI	97.0849	62.2089	0.312716	18.1396	3.0155	0.161714	0.445589	2.23701	4.10239	8.48845	0.119071	0.769121	100
25.02.14	P.Rosi	CF131/Eruptive unit 4	CF131_25E_2	Post-CI	96.6766	61.7961	0.415509	18.1694	2.95128	0.122574	0.417474	2.23756	4.54939	8.48747	0.0619592	0.791195	100
25.02.14	P.Rosi	CF131/Eruptive unit 4	CF131_26E_1	Post-CI	96.9056	62.4981	0.377997	18.1156	2.79158	0.133842	0.439397	2.26313	4.17654	8.32429	0.0815226	0.797993	100
25.02.14	P.Rosi	CF131/Eruptive unit 4	CF131_27E_1	Post-CI	98.454	60.2493	0.482357	18.2976	3.55384	0.188311	0.780669	2.92431	4.32578	8.30642	0.169216	0.722266	100
25.02.14	P.Rosi	CF131/Eruptive unit 4	CF131_29E_1	Post-CI	95.4365	62.1739	0.311935	17.938	2.86159	0.231148	0.375957	2.03853	4.42965	8.79066	0.0337397	0.814887	100
25.02.14	P.Rosi	CF131/Eruptive unit 4	CF131_2A_1	Post-CI	97.3342	61.839	0.402942	18.0577	3.01888	0.142601	0.479174	2.32652	4.3551	8.50092	0.0669857	0.810198	100
25.02.14	P.Rosi	CF131/Eruptive unit 4	CF131_2A_2	Post-CI	97.8539	60.9227	0.476833	18.0965	3.27151	0.150735	0.752857	2.83719	4.21475	8.32895	0.192532	0.755514	100
25.02.14	P.Rosi	CF131/Eruptive unit 4	CF131_2A_3	Post-CI	98.0172	60.4355	0.465837	18.1024	3.76026	0.0910044	0.782108	3.0712	4.25772	8.08817	0.189457	0.756296	100
25.02.14	P.Rosi	CF131/Eruptive unit 4	CF131_30E_1	Post-CI	98.2707	62.3602	0.4048	17.9465	2.90036	0.0897521	0.381599	2.07508	4.52464	8.4658	0.0836465	0.767574	100
25.02.14	P.Rosi	CF131/Eruptive unit 4	CF131_30E_2	Post-CI	97.8456	62.2807	0.3435	18.1568	2.82169	0.0757316	0.378147	2.12294	4.47072	8.45598	0.0900398	0.803817	100
25.02.14	P.Rosi	CF131/Eruptive unit 4	CF131_3A_2	Post-CI	93.5254	61.642	0.385457	18.075	2.98571	0.215129	0.471957	2.32771	4.63404	8.25562	0.110879	0.896548	100
25.02.14	P.Rosi	CF131/Eruptive unit 4	CF131_3A_4	Post-CI	92.2693	61.7579	0.351471	17.9567	3.26923	0.162459	0.418016	2.22653	4.49597	8.44029	0.144902	0.776531	100
25.02.14	P.Rosi	CF131/Eruptive unit 4	CF131_4A_1	Post-CI	96.2669	62.0844	0.322125	17.952	2.88022	0.218871	0.42351	2.10519	4.69019	8.45742	0.0613918	0.804742	100
25.02.14	P.Rosi	CF131/Eruptive unit 4	CF131_4A_2	Post-CI	98.7575	61.8747	0.355517	18.2492	2.8816	0.148849	0.373946	2.1083	4.54771	8.52634	0.114827	0.818976	100
25.02.14	P.Rosi	CF131/Eruptive unit 4	CF131_4A_3	Post-CI	94.214	62.1689	0.363746	18.0459	2.83843	0.103912	0.430615	2.10489	4.53531	8.49131	0.0839578	0.832997	100
25.02.14	P.Rosi	CF131/Eruptive unit 4	CF131_6A_1	Post-CI	97.5869	60.2422	0.435919	17.8638	3.55765	0.143872	1.04737	3.4188	4.26399	8.143	0.155964	0.727454	100
25.02.14	P.Rosi	CF131/Eruptive unit 4	CF131_6A_2	Post-CI	97.0728	60.2053	0.40928	18.2461	3.67096	0.0973496	0.802491	2.90153	4.46902	8.17768	0.203353	0.816913	100
21.03.14	P.Rosi	CF129/Eruptive unit 3	CF129_	Post-CI	95.6071	62.1186	0.334912	17.8838	2.83786	0.115054	0.427165	2.1308	4.76774	8.40115	0.0208144	0.962062	100
21.03.14	P.Rosi	CF129/Eruptive unit 3	CF129_	Post-CI	94.3175	62.0551	0.351897	17.8728	2.80457	0.232088	0.404061	2.09654	4.56946	8.60052	0.113977	0.898985	100
21.03.14	P.Rosi	CF129/Eruptive unit 3	CF129_	Post-CI	97.6749	62.2241	0.387715	17.9221	2.79263	0.119683	0.283491	2.03317	4.54129	8.70961	0.0422831	0.943948	100
21.03.14	P.Rosi	CF129/Eruptive unit 3	CF129_	Post-CI	95.0123	62.5105	0.365742	18.0278	2.6505	0.0700962	0.351112	2.02868	4.62066	8.28756	0.0555718	1.03176	100
21.03.14	P.Rosi	CF129/Eruptive unit 3	CF129_	Post-CI	94.8905	62.5906	0.428283	17.9531	2.65042	0.184212	0.37264	2.07903	4.25912	8.40179	0.0539569	1.02687	100
21.03.14	P.Rosi	CF129/Eruptive unit 3	CF129_	Post-CI	93.8331	62.2436	0.422878	17.5979	3.0453	0.246182	0.414779	2.08647	4.67767	8.07636	0.0786503	1.11016	100
21.03.14	P.Rosi	CF129/Eruptive unit 3	CF129_	Post-CI	97.5888	60.2416	0.365718	18.3385	3.56024	0.0688604	0.792509	2.63596	3.37457	10.0368	0.15053	0.434681	100
21.03.14	P.Rosi	CF129/Eruptive unit 3	CF129_	Post-CI	95.5006	61.2521	0.378427	18.159	3.14019	0.17225	0.524813	2.36187	3.8472	9.33355	0.0858633	0.744707	100
06.06.17	P.Rosi	CF129/Eruptive unit 3	CF129_1	Post-CI	94.4451	63.1545	0.35608	18.1861	2.73323	0.0898935	0.314998	2.02996	4.25019	8.16538	0.0278469	0.69183	100
06.06.17	P.Rosi	CF129/Eruptive unit 3	CF129_3	Post-CI	95.86	62.4611	0.370853	17.9766	2.69414	0.215627	0.332151	2.10536	4.70478	8.33351	0.0707281	0.735135	100
06.06.17	P.Rosi	CF129/Eruptive unit 3	CF129_4	Post-CI	94.7314	62.91	0.393323	18.0586	2.53548	0.11274	0.380339	2.01222	4.60006	8.19285	0.0542587	0.750121	100
06.06.17	P.Rosi	CF129/Eruptive unit 3	CF129_5	Post-CI	97.0059	62.5741	0.322661	17.8127	2.96693	0.175763	0.404821	2.11348	4.74868	8.08765	0.0447395	0.748408	100
06.06.17	P.Rosi	CF129/Eruptive unit 3	CF129_7	Post-CI	94.6924	62.6929	0.371519	17.839	2.91935	0.146369	0.344061	2.09869	4.41757	8.4106	0.00665312	0.753281	100
06.06.17	P.Rosi	CF129/Eruptive unit 3	CF129_8	Post-CI	95.6389	62.5737	0.411653	17.567	2.81298	0.115225	0.382376	2.13501	4.56676	8.63205	0.0626314	0.740598	100
06.06.17	P.Rosi	CF129/Eruptive unit 3	CF129_9	Post-CI	95.8792	60.8952	0.349815	18.4016	3.46718	0.0850028	0.816966	2.60766	3.00274	9.81162	0.19243	0.36984	100
06.06.17	P.Rosi	CF129/Eruptive unit 3	CF129_11	Post-CI	98.0206	62.9881	0.34605	17.6672	2.68668	0.154559	0.35921	1.87573	4.74421	8.36753	0.0693732	0.741375	100
06.06.17	P.Rosi	CF129/Eruptive unit 3	CF129_12	Post-CI	94.9902	63.0112	0.318875	17.9188	2.67617	0.156016	0.386566	2.07337	4.58416	8.04472	0.0234761	0.80661	100
06.06.17	P.Rosi	CF129/Eruptive unit 3	CF129_14	Post-CI	97.5212	62.7353	0.407706	18.0091	2.46818	0.11741	0.399913	2.06386	4.63602	8.42196	0	0.740557	100
06.06.17	P.Rosi	CF129/Eruptive unit 3	CF129_15	Post-CI	93.2455	62.797	0.324841	18.0871	2.71005	0.0839719	0.351223	2.04439	4.46853	8.32104	0.0729258	0.73891	100
06.06.17	P.Rosi	CF129/Eruptive unit 3	CF129_6A1	Post-CI	94.4784	62.0471	0.335738	18.0343	3.01889	0.151357	0.431951	2.28814	4.54824	8.3183	0.135269	0.69074	100
06.06.17	P.Rosi	CF129/Eruptive unit 3	CF129_8BLar_1	Post-CI	93.2873	62.8067	0.362322	17.9113	2.57334	0.181375	0.39105	2.12323	4.72926	8.05705	0.114592	0.749727	100
06.06.17	P.Rosi	CF129/Eruptive unit 3	CF129_8Bsm_1	Post-CI	98.4154	61.5773	0.421885	18.1594	3.10195	0.0365796	0.577958	2.63648	4.27067	8.33884	0.178326	0.700703	100
06.06.17	P.Rosi	CF129/Eruptive unit 3	CF129_9B_3	Post-CI	98.2952	62.6494	0.344473	17.8924	2.76443	0.190548	0.385166	2.07579	4.50826	8.41018	0.0498498	0.729435	100
06.06.17	P.Rosi	CF129/Eruptive unit 3	CF129_9B_4	Post-CI	97.7175	62.8433	0.373628	17.9275	2.89958	0.0902602	0.372707	2.04477	4.50104	8.17622	0.0589454	0.712053	100
06.06.17	P.Rosi	CF129/Eruptive unit 3	CF129_16C_2	Post-CI	95.4097	62.8341	0.393147	17.8959	2.64323	0.0880414	0.33047	2.07086	4.26665	8.70226	0.0657166	0.709676	100
06.06.17	P.Rosi	CF129/Eruptive unit 3	CF129_17C_1	Post-CI	95.4466	62.5455	0.362506	17.8902	2.62325	0.127715	0.380736	2.14539	4.76717	8.39684	0.0388699	0.721765	100
06.06.17	P.Rosi	CF129/Eruptive unit 3	CF129_17C_2	Post-CI	94.6176	62.6559	0.360504	17.9452	2.81068	0.0639416	0.358179	2.12571	4.41303	8.4237	0.109705	0.733479	100
06.06.17	P.Rosi	CF129/Eruptive unit 3	CF129_17C_3	Post-CI	94.2654	62.88	0.355486	17.9318	2.82182	0.0971725	0.404921	2.13164	4.02523	8.63169	0.0526174	0.667583	100
06.06.17	P.Rosi	CF129/Eruptive unit 3	CF129_18C_2	Post-CI	93.9693	62.5693	0.3963	18.0847	2.80219	0.123338	0.333939	2.00661	4.36706	8.48564	0.0564014	0.774508	100

## Sheet: EMP.Std Oxford
	Label	No	Ox%(Na)	Ox%(Mg)	Ox%(Al)	Ox%(Si)	Ox%(P )	Ox%(Cl)	Ox%(K )	Ox%(Ca)	Ox%(Ti)	Ox%(Mn)	Ox%(Fe)
140214	ATHO-G_1	282	4.3229	0.1077	12.3452	74.9817	0.0158	0.0335	2.7598	1.6785	0.286	0.1046	3.2555
140214	ATHO-G_2	283	3.8788	0.1116	12.3365	75.1812	0.0509	0.0545	2.7032	1.6824	0.25	0.0333	3.2911
140214	ATHO-G_3	96	4.348	0.1129	12.5014	74.975	0.0147	0.0489	2.7231	1.7187	0.2499	0.0608	3.3885
140214	ATHO-G_4	97	4.2396	0.0987	12.1967	75.5482	0.0255	0.0484	2.6533	1.7451	0.2177	0.1164	3.4396
140214	ATHO-G_5	368	4.4097	0.0723	12.4072	76.0623	0.0328	0.0282	2.726	1.7567	0.2817	0.0953	3.3187
140214	ATHO-G_6	1	2.6498	0.0985	12.4272	75.4915	0.0509	0.052	2.6812	1.7202	0.2426	0.1817	3.3983
25.02.14	ATHO-G_10		3.8304	0.0868	12.2065	75.3587	0.0246	0.0456	2.6395	1.6968	0.2796	0.1515	3.406
25.02.14	ATHO-G_11		3.8698	0.0818	12.1589	74.9504	0.0163	0.0447	2.5948	1.7501	0.2972	0.1399	2.9672
25.02.14	ATHO-G_12		4.144	0.0956	12.1681	75.1935	0.0366	0.0604	2.6421	1.8398	0.2408	0.1083	3.4308
25.02.14	ATHO-G_13		4.1124	0.0998	12.3236	75.4965	0	0.0539	2.6895	1.6206	0.2962	0.1006	3.3876
25.02.14	ATHO-G_14		3.9769	0.0687	12.1117	75.2495	0.0098	0.0466	2.6131	1.7144	0.2356	0.1359	3.1646
25.02.14	ATHO-G_15		4.0152	0.1288	12.1651	75.1843	0.0034	0.0635	2.7494	1.7245	0.2647	0.0811	3.0631
25.02.14	ATHO-G_16		4.0486	0.1042	12.0883	74.5537	0.0099	0.0592	2.6685	1.8003	0.2413	0.1482	3.2951
25.02.14	ATHO-G_17		4.1752	0.114	12.0685	75.0194	0.0192	0.0265	2.678	1.6746	0.2381	0.1007	3.1778
25.02.14	ATHO-G_18		3.9072	0.1267	12.3502	75.5227	0.0308	0.0616	2.7378	1.7439	0.2883	0.0752	3.2852
25.02.14	ATHO-G_4		4.0825	0.0808	12.3157	75.6683	0.0095	0.0701	2.7728	1.7222	0.3031	0.1186	3.1966
25.02.14	ATHO-G_7		4.1458	0.1067	12.0929	74.8279	0.0187	0.0531	2.6946	1.6951	0.2646	0.0613	3.0918
25.02.14	ATHO-G_8		4.2994	0.0848	12.0962	74.7743	0.0165	0.0319	2.6134	1.6739	0.2636	0.1733	3.1417
25.02.14	ATHO-G_9		4.1228	0.0941	12.1303	75.6969	0.0548	0.0397	2.7412	1.7697	0.243	0.0864	3.25
240615	ATHO1G_1	1	3.9141	0.0892	12.1844	74.9566	0.0033	0.0473	2.7339	1.7134	0.2706	0.0995	3.3342
240615	ATHO1G_2	4	4.369	0.1437	12.4957	75.0929	0.0364	0.0418	2.8148	1.6669	0.3219	0.1233	3.0405
240615	ATHO1G_3	27	4.3231	0.1086	12.1278	74.9945	0.0173	0.0536	2.699	1.6822	0.264	0.1348	3.2782
240615	ATHO1G_4	48	3.9007	0.1288	12.3183	75.2366	0.0173	0.0427	2.7303	1.6793	0.3044	0.0853	3.0093
240615	ATHO1G_5	71	4.3236	0.1074	12.2746	74.7093	0.0288	0.0391	2.7105	1.6511	0.2951	0.0314	3.1541
240615	ATHO1G_6	111	4.2886	0.1452	12.2527	74.9508	0.0265	0.0182	2.7082	1.6819	0.2851	0.0918	3.1233
240615	ATHO1G_7	144	4.0776	0.0807	12.141	75.0196	0.0065	0.0408	2.6624	1.6439	0.2755	0.1045	3.1317
240615	ATHO1G_8	195	4.0144	0.0968	12.2513	75.3415	0.0655	0.0411	2.7554	1.7386	0.1964	0.1134	3.2182
240615	ATHO1G_9	221	4.0543	0.1132	12.2327	74.698	0	0.03	2.7043	1.7202	0.2662	0.0814	3.2053
240615	ATHO1G_10	254	3.9512	0.104	12.4356	75.4192	0.0468	0.0354	2.7472	1.7067	0.2798	0.0295	3.3006
240615	ATHO1G_12	262	3.9259	0.1359	12.1493	75.5533	0	0.0418	2.7763	1.6932	0.273	0.0327	2.9801
240615	ATHO1G_11	276	4.393	0.0794	11.9971	74.9525	0.0821	0.0319	2.7536	1.7082	0.2066	0.0617	3.3025
060617	ATHO1_1	1	4.3199	0.1164	12.1979	75.2049	0.0199	0.0377	2.8135	1.6887	0.2611	0.2125	3.1677
060617	ATHO1_2	4	2.7803	0.0807	12.4494	75.9844	0.0282	0.0385	2.7554	1.6675	0.223	0.1961	3.13
060617	ATHO1_3	8	3.9845	0.0675	12.3012	74.8999	0	0.02	2.714	1.6369	0.258	0.0845	3.2501
060617	ATHO1_4	42	4.4727	0.0877	12.1573	75.1022	0.041	0.0414	2.6558	1.6778	0.2007	0.0869	3.2216
060617	ATHO1_5	65	3.9696	0.0927	12.3129	75.6089	0.0434	0.0473	2.7427	1.6216	0.2251	0.0726	3.0464
060617	ATHO1_6	92	4.2778	0.0716	12.1096	75.1664	0	0.0546	2.7863	1.6783	0.1836	0.0935	3.0029
060617	ATHO1_7	123	4.3303	0.0795	12.1767	75.274	0.0281	0.0384	2.8519	1.6921	0.2742	0.0514	3.0419
060617	ATHO1_8	146	4.1661	0.1014	12.462	75.0674	0.0105	0.0288	2.7749	1.696	0.2926	0.1425	3.2698
060617	ATHO1_9	169	4.1956	0.0831	12.2677	75.1236	0.0135	0.0339	2.6655	1.7795	0.2667	0.1726	3.2964
060617	ATHO1_10	194	4.1586	0.0967	12.5163	75.4198	0.0282	0.046	2.7925	1.6122	0.2231	0.1726	3.4448
060617	ATHO1_11	231	4.1755	0.0979	12.3697	75.6158	0	0.0267	2.6891	1.66	0.2654	0.1099	3.045
060617	ATHO1_12	232	4.1305	0.0619	12.2107	75.4889	0.0323	0.0341	2.7872	1.696	0.2594	0.1006	2.9608
060617	ATHO1_13	233	4.0906	0.0911	12.4231	74.8965	0	0.0355	2.6418	1.6613	0.2544	0.0422	3.237
	AVERAGE		4.07197	0.0985364	12.2569	75.2162	0.0230977	0.042475	2.717	1.69957	0.259316	0.104552	3.20776
			0.343715	0.0200311	0.133964	0.334807	0.0191405	0.011675	0.0586663	0.0467739	0.0310674	0.0452028	0.13772
140214	GOR128-G_1	364	0.453	25.3829	9.9139	46.6546	0.0458	0.0124	0.0422	6.2377	0.2834	0.1873	9.4695
25.02.14	GOR128-G_10		0.5435	25.8275	9.9578	45.8023	0	0.008	0.0694	6.1776	0.2717	0.1695	9.7188
25.02.14	GOR128-G_11		0.6757	25.8018	10.0511	46.7336	0.0359	0.0072	0.0471	6.25	0.2966	0.1269	9.8306
25.02.14	GOR128-G_12		0.5011	25.9105	9.9513	46.2832	0.0444	0.0053	0.0341	6.2749	0.3062	0.1987	9.8534
25.02.14	GOR128-G_13		0.5204	25.6478	9.8841	46.191	0.0232	0	0.0339	6.2116	0.2522	0.1811	9.6801
25.02.14	GOR128-G_14		0.5296	25.6062	9.8263	46.0989	0.0374	0.0241	0.0615	6.1442	0.2559	0.1786	9.7016
25.02.14	GOR128-G_15		0.5472	25.7551	9.6869	45.6337	0.0152	0.0108	0.035	6.2394	0.2313	0.1512	9.8798
25.02.14	GOR128-G_16		0.576	25.6987	9.7463	45.4599	0.0303	0	0.0182	6.228	0.2688	0.1675	9.7428
25.02.14	GOR128-G_17		0.4723	25.6442	10.0557	46.345	0.0291	0	0.0325	6.2096	0.2742	0.1595	9.8842
25.02.14	GOR128-G_18		0.6143	25.4911	9.8009	45.8142	0.0011	0.0009	0.0281	6.2387	0.2971	0.1611	10.008
140214	GOR128-G_2	365	0.5439	25.7083	10.0482	46.5011	0.0065	0.0195	0.0594	6.2663	0.2577	0.0936	10.0287
140214	GOR128-G_3	128	0.5731	25.6782	9.9625	46.1394	0.028	0	0.057	6.2076	0.2717	0.1713	10.0291
140214	GOR128-G_4	129	0.4927	25.5089	9.9999	46.3168	0.026	0	0.0532	6.1758	0.2938	0.2256	10.2048
140214	GOR128-G_5	2	0.5488	25.6919	9.9681	46.9169	0.0262	0.0054	0.037	6.326	0.2921	0.159	9.5457
25.02.14	GOR128-G_5		0.4903	25.74	10.0253	46.0351	0.029	0.0027	0.0371	6.2863	0.2738	0.2296	10.1869
140214	GOR128-G_6	3	0.5016	25.6026	9.9391	46.2307	0.0401	0.0116	0.0428	6.3138	0.2544	0.2743	10.035
25.02.14	GOR128-G_8		0.5265	25.2589	9.6766	45.8038	0	0.0187	0.0426	6.1444	0.2694	0.2944	9.3087
25.02.14	GOR128-G_9		0.4934	25.4244	9.8481	45.6101	0.0156	0.0018	0.0664	6.1263	0.2726	0.1236	9.6224
240615	GOR132-G_1	3	0.8297	22.0533	10.8245	45.4761	0.0217	0	0.0281	8.5338	0.2881	0.2408	10.1318
240615	GOR132-G_2	5	0.8054	22.3097	10.8616	45.4143	0	0.0133	0.0112	8.683	0.2627	0.0944	10.1484
240615	GOR132-G_3	28	0.6817	22.2777	10.9993	45.8712	0.1208	0	0.0277	8.2911	0.2651	0.1817	10.1955
240615	GOR132-G_4	49	0.8596	22.4414	11.0599	45.2784	0.0562	0.0194	0.0331	8.3739	0.3187	0.1213	10.5687
240615	GOR132-G_5	69	0.8089	22.1963	10.6767	45.2532	0.0999	0.0044	0.0236	8.5636	0.2931	0.1795	10.1869
240615	GOR132-G_6	112	0.8961	22.1697	10.9856	45.6295	0.0586	0	0.0098	8.5475	0.2587	0.1292	10.1504
240615	GOR132-G_7	145	0.8312	22.2355	10.9903	45.4603	0.0293	0.0212	0.0324	8.4436	0.3473	0.1568	10.199
240615	GOR132-G_8	196	0.9204	22.1857	10.6502	45.0297	0.0512	0.0018	0.0225	8.4741	0.3646	0.1722	10.2617
240615	GOR132-G_9	222	0.8126	22.0856	10.8386	45.4108	0.0237	0.0124	0.0469	8.5046	0.3061	0.1302	10.0488
240615	GOR132-G_10	255	0.8561	22.144	10.9901	44.9986	0.03	0.0088	0.027	8.4851	0.3033	0.1251	10.4452
240615	GOR132-G_12	264	0.7599	22.2787	10.8554	44.7961	0	0.0035	0.0551	8.5795	0.2909	0.1532	10.324
240615	GOR132-G_11	277	0.7847	22.0215	10.6479	44.6935	0.0573	0	0.0301	8.3862	0.3592	0.1702	10.4999
060617	GOR132_1	3	0.6676	21.905	11.0156	45.6307	0.0272	0.0223	0.0267	8.4839	0.2608	0.2088	10.0399
060617	GOR132_2	6	0.8255	22.2297	10.9311	46.0144	0.0702	0	0.0228	8.4703	0.2726	0.1064	10.4636
060617	GOR132_3	9	0.7771	22.2367	10.9346	45.6457	0.0334	0.0195	0.0529	8.3451	0.3172	0.1775	10.1608
060617	GOR132_4	44	0.8728	22.0891	11.0179	45.7281	0.0096	0.013	0.0406	8.317	0.3252	0.1215	9.8814
060617	GOR132_5	67	0.8283	22.1854	10.794	45.9929	0.0339	0.0165	0.0534	8.4468	0.2714	0.1979	10.2546
060617	GOR132_6	94	0.9296	22.1189	10.9159	45.7978	0	0	0.0297	8.403	0.3177	0.128	9.7419
060617	GOR132_7	125	0.7413	22.025	10.8582	45.8679	0.0153	0	0.0408	8.4022	0.2974	0.1595	9.7725
060617	GOR132_8	148	0.8167	22.0088	10.7769	45.7521	0.0689	0.0079	0.0588	8.4444	0.2948	0.1885	10.2156
060617	GOR132_9	171	0.8361	22.0825	10.7722	46.0697	0.0617	0	0.0307	8.4083	0.3059	0.0682	10.4452
060617	GOR132_10	195	0.8976	22.3548	10.8361	45.7129	0.0532	0	0.0431	8.5693	0.2873	0.2249	10.3491
060617	GOR132_11	237	0.813	22.2616	10.9504	45.8653	0.0459	0.0072	0.0404	8.398	0.33	0.1048	10.0361
060617	GOR132_12	238	0.8014	22.0217	10.8499	45.6189	0.0068	0	0.0281	8.4561	0.3561	0.1722	10.0053
060617	GOR132_13	239	0.7058	22.1322	10.8618	46.1898	0.0294	0.0195	0.0422	8.3477	0.2737	0.1638	10.516
	AVERAGE		0.814364	22.162	10.8758	45.5679	0.040168	0.007628	0.034308	8.45432	0.302716	0.155064	10.2017
			0.067216	0.124492	0.115085	0.390725	0.0304034	0.00823451	0.0128607	0.0921816	0.031645	0.0418833	0.221634
140214	StHs6/80-G_1	220	4.5514	1.9624	17.5289	63.6069	0.1084	0.0036	1.3153	5.2472	0.6941	0.0365	4.1006
140214	StHs6/80-G_2	221	4.8131	1.9153	17.6612	63.7729	0.1641	0.0054	1.2927	5.2366	0.7354	0.0616	4.1931
140214	StHs6/80-G_3	366	4.5358	1.9446	17.5427	63.9015	0.1519	0.0233	1.3005	5.2577	0.7033	0.0978	4.419
140214	StHs6/80-G_4	367	4.2878	1.965	17.3665	64.1165	0.1325	0	1.3908	5.2992	0.6928	0.0217	4.0581
140214	StHs6/80-G_5	4	4.4006	1.9199	17.4285	63.4992	0.1304	0.0018	1.3079	5.2851	0.6492	0.1141	4.2122
140214	StHs6/80-G_6	5	4.678	1.95	17.4619	63.3653	0.1439	0.0306	1.2739	5.2402	0.7082	0.065	4.3056
25.02.14	StHs-G_10		4.463	1.9477	17.5494	62.6633	0.1867	0.0171	1.2861	5.205	0.731	0.0959	4.5694
25.02.14	StHs-G_11		4.3356	2.0246	17.6109	63.4604	0.1798	0.0226	1.2656	5.1942	0.6969	0	4.5014
25.02.14	StHs-G_12		4.5729	1.9697	17.8762	63.9234	0.1678	0.0026	1.4057	5.4173	0.6987	0.0387	4.6958
25.02.14	StHs-G_13		3.8194	1.9933	18.0783	64.3846	0.1956	0.0273	1.3329	5.3508	0.7713	0	4.5175
25.02.14	StHs-G_14		4.3077	1.9099	17.7172	63.5004	0.1834	0.0117	1.326	5.305	0.6808	0.0834	4.485
25.02.14	StHs-G_15		4.7428	1.9241	17.7294	63.4909	0.176	0.0009	1.366	5.2536	0.7392	0.0226	4.1662
25.02.14	StHs-G_16		4.3265	1.8921	17.6124	62.9475	0.1946	0.0126	1.2897	5.2405	0.7473	0.1183	4.3887
25.02.14	StHs-G_17		4.4706	1.9499	17.5378	63.4526	0.1854	0.0017	1.2937	5.168	0.6846	0.0626	4.3712
25.02.14	StHs-G_18		4.4045	1.991	17.7559	63.3782	0.1688	0.0163	1.3485	5.2691	0.6714	0.0284	4.1415
25.02.14	StHs-G_19		4.5788	1.9648	17.7675	63.1527	0.1447	0	1.3108	5.0792	0.6476	0.1441	4.3614
25.02.14	StHs-G_4		4.4585	1.9586	17.7999	63.0904	0.1526	0.0118	1.3762	5.3066	0.745	0.1308	4.3448
25.02.14	StHs-G_7		4.3633	2.0048	17.7909	63.7229	0.1972	0.0173	1.3421	5.4202	0.7773	0.0663	4.4826
25.02.14	StHs-G_8		4.4935	1.9836	18.037	63.8107	0.1651	0.0274	1.2348	5.3469	0.785	0.0034	4.4797
25.02.14	StHs-G_9		4.4061	1.9334	17.9147	63.3024	0.1668	0.0145	1.2661	5.3659	0.7351	0.0944	4.3826
240615	StHsG_1	2	4.5111	1.8921	17.6424	63.493	0.1414	0.0072	1.3519	5.3762	0.7473	0.0621	4.5424
240615	StHsG_2	6	4.6117	1.9958	17.751	63.36	0.1825	0.0153	1.2975	5.3969	0.7369	0.0544	4.4897
240615	StHsG_3	29	4.5903	1.9734	17.7759	63.0803	0.1423	0.0036	1.3043	5.3392	0.6952	0.0345	4.3892
240615	StHsG_4	50	4.5355	1.9319	17.5814	63.3991	0.1378	0.0099	1.3136	5.2049	0.6701	0.0224	4.5438
240615	StHsG_5	70	4.5572	1.972	17.6834	63.5501	0.1991	0.0108	1.3338	5.3786	0.7892	0.1367	4.4349
240615	StHsG_6	113	4.4132	1.9431	17.8467	63.791	0.1303	0.0199	1.295	5.2126	0.6493	0.0398	4.1716
240615	StHsG_7	146	4.5741	1.8643	17.7498	63.2003	0.1357	0	1.2797	5.3282	0.6741	0.0992	4.4232
240615	StHsG_8	197	4.5874	1.9787	17.7572	63.0143	0.2276	0.0252	1.3325	5.3608	0.7581	0.119	4.247
240615	StHsG_9	223	4.7078	1.962	17.6788	63.595	0.1863	0.0243	1.2201	5.4189	0.677	0.0697	4.3111
240615	StHsG_10	256	4.4129	1.9337	17.5133	63.1906	0.1639	0.0234	1.3386	5.3367	0.659	0.0518	4.2473
240615	StHsG_12	263	4.6746	1.9107	17.4674	63.2122	0.1178	0.0036	1.293	5.3294	0.69	0	4.5316
240615	StHsG_11	275	4.5473	2.0542	17.3432	62.7711	0.1697	0	1.2772	5.2024	0.6936	0.0915	4.5033
060617	StHs_1	2	4.6364	1.9069	17.7297	63.4288	0.1803	0.0132	1.2951	5.339	0.7255	0.0084	4.4586
060617	StHs_2	5	4.6602	1.9748	17.4913	63.6015	0.1835	0.0103	1.2519	5.2205	0.7724	0	4.5424
060617	StHs_3	7	4.4991	1.9453	17.7379	63.567	0.162	0	1.2955	5.2929	0.691	0.1136	4.7837
060617	StHs_4	43	4.5286	1.9468	17.3453	63.321	0.1514	0.0198	1.3424	5.4064	0.7356	0.1438	4.0384
060617	StHs_5	66	4.5396	1.9616	17.8377	63.5836	0.2069	0.008	1.2838	5.3066	0.6122	0.1252	4.3982
060617	StHs_6	93	4.4518	1.9845	17.7696	63.5675	0.1466	0.0183	1.2421	5.3645	0.6679	0.0654	4.3495
060617	StHs_7	124	4.8447	1.9937	17.679	63.3716	0.1558	0.0212	1.3377	5.2108	0.6737	0.1015	4.3593
060617	StHs_8	147	4.6126	1.9551	17.7822	63.7379	0.1431	0	1.3379	5.2103	0.776	0.0378	4.4156
060617	StHs_9	170	4.7276	1.9738	17.5907	63.8386	0.1736	0.0095	1.3666	5.2075	0.6962	0.0922	4.6402
060617	StHs_10	196	4.8143	1.9509	17.2802	63.7534	0.2183	0.0124	1.2696	5.2988	0.6653	0	4.3901
060617	StHs_11	234	4.5264	1.9747	17.3514	63.5258	0.1801	0.0301	1.3443	5.2886	0.691	0.0876	4.0682
060617	StHs_12	235	4.2896	1.976	17.4248	63.7983	0.1819	0.0103	1.3715	5.1408	0.7415	0.0295	4.2511
060617	StHs_13	236	4.6245	1.9957	17.498	63.919	0.1757	0.0168	1.3096	5.3126	0.7365	0.0841	4.2905
	AVERAGE	79	4.52196	1.95681	17.6461	63.4936	0.166429	0.01248	1.31134	5.28828	0.709307	0.0656844	4.37772
			0.351132	0.0725021	0.368161	0.675639	0.0521607	0.0185627	0.0825054	0.159608	0.084638	0.0876347	0.337553

## Sheet: LA-ICP-MS.Dublin (S-19 +PR)
Date	Major element classification group	Sample I.d.	V	Rb	Sr	Y	Zr	Nb	Ba	La	Ce	Pr	Nd	Sm	Eu	Gd	Dy	Er	Yb	Ta	Th	U		V	Rb	Sr	Y	Zr	Nb	Ba	La	Ce	Pr	Nd	Sm	Eu	Gd	Dy	Er	Yb	Ta	Th	U
			(ppm)																					2 SE
13.10.15	1	S19_22.90m_14B	37.0496	328.817	180.984	29.5507	356.637	52.3943	58.4201	71.5285	132.511	14.5762	47.1926	9.42387	-	7.28084	5.40985	3.41129	2.82086	2.75193	31.38	11.0474		3.62108	41.753	13.8317	2.01631	25.0827	4.26985	4.58058	6.07913	10.3343	1.30691	3.60014	1.1739	0.233206	0.936466	0.576201	0.321739	0.28719	0.160838	2.42624	1.29088
13.10.15	1	S19_22.90m_15B	33.7538	323.284	155.548	28.9399	354.744	52.2478	42.4203	68.1313	128.88	13.5945	47.0919	8.84858	1.8716	6.47443	5.49005	3.10954	2.76018	2.64349	30.4059	10.6298		3.29213	32.3099	12.8363	2.11075	28.4283	4.60181	4.94896	4.97307	11.2737	1.05884	3.37644	0.81854	0.23038	0.728164	0.539732	0.341341	0.324718	0.234979	2.71633	0.915912
13.10.15	2	S19_22.90m_4A	64.9262	253.442	525.991	17.7183	167.162	27.7992	682.377	42.3657	87.3522	9.17932	30.6393	5.29674	1.85217	4.50339	3.52298	1.96151	1.6878	1.3586	13.278	4.9082		5.26946	23.2463	41.9955	1.14794	13.9027	3.23863	59.9902	3.13099	7.60795	0.755907	3.16157	0.641669	0.242771	0.793853	0.512767	0.293824	0.295316	0.140193	0.894327	0.423375
13.10.15	2	S19_22.90m_4A	65.877	249.159	539.62	19.0217	170.232	28.8432	748.753	43.7017	79.8954	8.82771	32.865	5.51135	1.84136	4.18791	3.63133	1.77448	1.89758	1.23393	13.4855	4.42802		8.52343	37.3281	61.1669	2.09481	15.6363	3.00962	103.262	5.37283	9.94576	1.03975	3.77964	0.844248	0.239252	0.673114	0.435568	0.255103	0.28954	0.160748	1.57204	0.592871
13.10.15	2	S19_22.90m_11B	71.2349	242.207	628.701	18.0001	158.385	27.7286	1022.3	40.4817	77.7921	8.19158	31.4962	5.75864	2.04716	4.75938	3.41254	1.93516	1.92182	1.2705	12.8328	4.51608		6.42174	30.6873	58.2777	0.868524	9.67779	2.16304	94.7794	2.88033	5.91519	0.564656	3.14159	0.711951	0.239408	0.784101	0.377655	0.244384	0.339422	0.124436	1.04711	0.396742
13.10.15	2	S19_22.90m_24C	61.2425	256.022	462.854	19.1083	180.821	28.6965	567.517	42.5831	84.6092	9.12297	32.4479	5.89312	1.94529	4.49417	3.86737	1.79606	1.87181	1.32838	14.2579	5.29008		6.47808	30.4943	48.4198	1.6794	17.2023	3.41698	74.1555	3.7285	7.61659	0.917266	3.48623	0.639012	0.281675	0.833434	0.517595	0.249162	0.315726	0.125106	1.45731	0.599846
13.10.15	2	S19_22.90m_24C	55.6173	254.014	428.177	17.7475	170.558	28.0155	483.532	41.1482	84.2134	8.26961	30.5276	6.01075	1.70192	4.27557	3.56714	-	1.92778	1.28863	13.0252	4.66239		5.96452	28.7127	40.8568	1.45049	15.3088	2.78188	44.5968	3.57443	8.41554	0.712738	2.77981	0.717099	0.177823	0.534347	0.394411	0.259346	0.237933	0.117007	1.07564	0.582792
13.10.15	2	S19_22.90m_26D	69.2667	233.954	549.535	18.1774	165.219	29.8442	762.252	41.1425	84.1448	8.83682	32.5796	6.05892	2.03904	4.34882	3.3802	1.76525	1.84409	1.19026	12.9838	4.76341		7.66835	23.2453	47.4475	1.51602	13.4705	3.1781	83.2517	3.23121	11.3113	0.876125	2.89986	0.798955	0.258852	0.504851	0.349982	0.263044	0.296933	0.105593	1.1941	0.508257
13.10.15	2	S19_22.90m_26D	72.7365	249.549	566.949	18.1698	161.699	29.9262	797.623	44.9243	89.4085	8.9952	33.8924	5.65867	2.24394	4.15364	3.49436	2.03269	1.91743	1.2737	14.2409	5.00753		11.5958	25.5551	67.7257	2.1743	14.9582	4.26689	126.229	5.35721	10.8566	0.982783	3.35043	0.733212	0.389039	0.623885	0.376966	0.25919	0.316933	0.1741	2.24746	0.942005
13.10.15	2	S19_22.90m_29D	58.4958	243.379	528.978	17.8018	172.643	28.6678	683.983	43.6455	87.4606	9.0395	31.6542	5.6718	1.76535	4.05712	3.6029	1.82568	1.4988	1.31118	13.4877	5.1898		6.29318	33.4881	76.539	1.59767	14.8241	4.26105	95.9428	4.95024	10.7673	0.855394	2.57483	0.874453	0.267752	0.551512	0.310484	0.285303	0.262164	0.147822	1.76804	0.873656
13.10.15	2	S19_22.90m_30D	60.2502	290.826	403.282	20.4333	214.485	35.4891	440.855	49.1395	96.2464	9.96496	35.9394	6.63785	1.90898	4.82802	3.77727	2.17906	2.10297	1.57448	16.9265	5.927		8.39413	38.3868	44.3898	1.54359	16.8795	3.20094	47.2738	3.90762	8.93167	1.2191	3.09909	0.977507	0.260328	0.722086	0.616594	0.334202	0.289348	0.133455	1.81158	0.64263
13.10.15	2	S19_22.90m_32D	57.5119	247.249	462.946	20.4431	193.702	33.1829	514.431	49.0091	94.9727	9.82963	35.5496	6.08931	2.06631	4.89069	4.0198	2.19251	2.03131	1.47982	16.1525	5.68652		5.01109	19.4625	35.3537	1.39877	12.3171	2.46327	37.4893	3.28452	5.85985	0.629646	2.84397	1.16819	0.192535	0.55433	0.45799	0.253286	0.311031	0.13527	1.10839	0.617145
13.10.15	Intermediate/mixed	S19_22.90m_23C	37.6986	316.209	243.698	25.9394	304.934	43.5772	91.1255	59.6191	118.762	12.611	42.1894	7.64822	1.7474	6.12229	4.97428	2.82517	2.70386	2.17731	25.8668	8.5166		3.91989	36.3656	25.3713	2.20957	30.0592	3.96265	8.2941	5.04694	12.7216	1.38048	4.12265	0.979359	0.210344	0.854714	0.67628	0.41241	0.355826	0.221037	2.11276	0.773346
13.10.15	Intermediate/mixed	S19_22.90m_9B	42.8955	309.65	268.951	23.6515	277.089	44.0289	137.184	57.4771	110.064	11.0202	39.3552	7.60222	1.86247	5.68284	4.24363	2.44059	-	2.14393	24.5727	9.25154		4.81093	22.5701	18.2085	1.69546	17.3785	3.67244	10.0476	3.77857	6.75943	0.733564	2.73284	0.799842	0.165752	0.906565	0.582423	0.311384	0.401133	0.196198	1.88599	0.873985
13.10.15	1	S19_25.80m_1A	32.5446	338.507	163.009	30.1323	350.455	55.3027	34.6647	72.9453	138.075	14.4725	51.9844	8.84896	1.79341	6.69168	5.44347	3.18195	3.25971	2.54233	32.8632	10.5031		4.29882	38.0343	14.8993	2.13415	18.8281	5.24035	4.39297	6.76252	12.1367	1.16358	4.23427	0.98782	0.268677	0.797181	0.446591	0.355139	0.447753	0.176809	3.4187	1.23424
13.10.15	1	S19_25.80m_2A	32.9161	375.296	201.349	29.1324	320.616	49.6585	45.1976	71.6339	130.261	14.0839	48.903	8.13452	1.89554	7.03124	5.1107	3.0178	3.06248	2.51375	30.8301	10.1442		3.92798	53.6244	19.5742	1.89469	29.8625	4.46778	6.48597	7.00412	13.7474	1.20081	5.15832	0.996266	0.296322	0.952754	0.590587	0.288893	0.573522	0.187282	3.14913	1.16989
13.10.15	1	S19_25.80m_4A	31.3837	360.93	136.467	29.9096	355.005	55.904	22.2193	73.5521	137.428	14.1797	50.2337	7.92789	1.69083	7.02138	5.74655	3.18751	2.85016	2.65309	30.5201	10.5488		2.87993	29.0137	14.6673	1.89367	22.1046	5.32968	2.26944	8.13202	12.3622	1.14718	4.11127	1.293	0.20998	1.01627	0.732504	0.328227	0.425748	0.265594	2.37733	1.38331
13.10.15	1	S19_25.80m_6A	32.4848	322.176	161.546	28.9279	328.43	50.837	67.7878	69.2626	131.353	13.9832	51.9095	8.28101	1.58742	7.19413	5.17186	3.05407	3.18755	2.64919	31.2504	10.3632		3.29562	21.5925	10.4827	1.36604	22.7535	4.95968	4.97845	3.76624	9.19125	0.986044	3.26697	0.78494	0.172807	0.753591	0.460183	0.281878	0.403687	0.164785	1.44343	0.589559
13.10.15	1	S19_25.80m_8B	35.405	347.208	201.791	27.0709	317.835	49.069	84.1351	67.0175	128.29	13.3261	47.9023	7.92132	1.54732	6.76461	4.93947	2.64092	3.13848	2.59231	30.1337	10.8625		3.35749	34.0723	28.2565	1.5094	18.9543	3.86993	11.081	4.53029	11.6929	0.84409	3.60002	1.02719	0.150697	0.647534	0.59574	0.307219	0.454589	0.197003	1.78345	0.775284
13.10.15	1	S19_25.80m_12B	33.0618	368.973	139.313	31.5118	365.898	59.3404	24.6163	73.2032	149.28	14.6938	54.8399	9.25227	1.73438	7.25377	6.51173	3.37721	3.10645	2.74126	33.8912	12.1293		3.83593	30.6558	8.13699	1.82977	27.8802	5.49989	2.58774	3.90269	12.0186	1.04119	5.18079	0.916578	0.163294	0.655106	0.51667	0.442917	0.42271	0.240018	1.85783	1.16105
13.10.15	1	S19_25.80m_16B	41.8643	366.374	224.031	31.0995	346.755	54.1912	154.518	70.9131	140.736	14.48	52.3794	8.92405	1.73336	7.00575	5.56892	3.13688	3.21666	2.66539	32.8287	11.0403		4.22398	37.2157	13.5898	1.55371	14.4674	4.91061	11.3586	4.04428	10.9131	0.953137	4.03303	1.07613	0.17834	0.594324	0.415089	0.283224	0.351539	0.164062	1.4933	0.64495
13.10.15	1	S19_25.80m_18C	31.0808	375.032	151.053	31.012	343.932	52.3396	31.0029	70.736	138.787	14.6342	48.8056	8.18498	1.67572	7.23188	5.51122	3.0268	3.11668	2.62794	32.9941	11.3453		3.50131	38.5738	20.0545	2.57782	36.1923	6.30536	3.82054	6.46363	16.0363	1.97642	6.48776	0.922116	0.255918	0.953458	0.857473	0.392678	0.381657	0.308632	3.82795	1.44075
13.10.15	1	S19_25.80m_25D	31.1812	340.467	127.562	31.0668	365.332	53.9257	27.6198	72.9341	146.956	14.7903	48.6056	9.31926	1.8054	6.72115	5.80315	3.03208	3.00211	2.76554	32.6926	11.0969		2.44024	30.4951	9.50624	2.07144	20.8185	4.19799	1.50737	5.09236	10.6303	0.986866	3.32735	0.685284	0.147907	0.82948	0.634148	0.308509	0.383425	0.151265	2.00333	0.878564
13.10.15	1	S19_25.80m_27D	36.2965	344.401	219.181	29.5125	355.25	59.5128	104.581	71.0898	149.086	14.393	47.7309	8.10634	1.83502	6.72095	5.05484	2.89614	3.09111	2.6536	29.6972	11.351		4.13802	54.5031	27.5133	3.43957	38.7911	7.3931	20.4293	10.3269	20.9413	1.44595	5.14166	1.32528	0.304132	1.23944	0.688071	0.464887	0.515928	0.322042	3.14693	1.3982
13.10.15	1	S19_25.80m_28D	33.3662	345.51	149.095	32.0193	371.176	61.6753	26.5132	70.9493	146.186	14.6488	49.0009	8.67312	1.75813	6.73266	5.26728	2.82072	3.01585	2.78204	31.5528	11.8703		3.37721	44.34	15.9415	2.78408	33.1534	8.7103	3.28707	7.31518	17.6926	1.13681	3.69117	0.816855	0.168376	0.964167	0.426558	0.297697	0.435946	0.267183	2.59578	1.3315
13.10.15	1	S19_25.80m_29D	31.7983	330.46	130.014	31.9415	379.745	60.5648	21.9768	71.5159	152.104	14.3583	49.7271	9.39195	1.82394	6.7717	6.04184	3.01582	3.39846	2.74011	33.1389	11.5929		3.82197	29.5949	11.1886	2.29602	29.605	5.87306	2.44667	5.91096	16.507	1.21006	3.85196	0.966417	0.284207	1.0234	0.639986	0.335212	0.593025	0.217493	2.40088	0.858872
13.10.15	2	S19_25.80m_9B	52.6588	310.742	449.6	20.1907	185.638	30.6444	365.725	50.8778	92.6684	9.48137	36.792	5.96136	2.19701	5.47511	3.91215	2.19949	1.74424	1.47249	16.2461	5.4378		7.92953	37.6097	34.7142	1.52228	17.4793	4.03908	43.166	5.3109	12.612	1.03075	4.3024	0.858533	0.375089	0.786777	0.584116	0.285066	0.338061	0.162887	1.08721	0.519447
13.10.15	2	S19_25.80m_10B	70.3681	289.542	645.446	18.6729	167.232	27.2007	894.953	46.3901	85.5286	9.6307	31.9875	5.91888	1.90805	5.02522	3.72163	1.84361	1.9712	1.4253	14.2302	4.76375		12.8876	38.6361	104.905	2.07226	23.5961	3.39847	166.651	5.85108	13.842	1.2062	3.78242	1.27145	0.321164	0.850686	0.561325	0.365902	0.394873	0.205187	2.23263	0.848269
13.10.15	2	S19_25.80m_10B	69.4482	258.73	638.592	18.0431	162.508	27.6734	879.226	44.5571	82.3844	8.79441	32.7719	5.97787	2.11847	4.68082	3.73128	1.59871	1.62639	1.32954	14.398	5.27815		9.44235	32.6417	79.073	1.61835	14.5238	3.0348	124.118	6.00541	10.7762	0.87559	2.43083	0.699994	0.297036	0.697495	0.504143	0.185145	0.220627	0.119399	2.36005	0.716609
13.10.15	2	S19_25.80m_11B	68.7806	323.678	657.119	21.6592	193.731	33.3558	883.64	48.606	99.6415	10.1702	35.1604	7.14769	2.43516	5.8351	4.16936	2.2413	1.9922	1.35139	14.9895	5.35243		12.9597	75.6676	96.918	3.14856	30.8494	5.65058	189.807	8.09428	20.9713	1.57938	3.67396	1.26747	0.451521	1.25089	0.805028	0.344398	0.522948	0.237883	2.75366	1.08137
13.10.15	2	S19_25.80m_15B	65.054	288.07	605.67	19.8959	170.624	28.5542	729.863	43.6224	83.4009	9.40894	32.3009	5.76518	2.12671	4.73737	3.64739	1.91585	1.9599	1.39814	13.8849	4.59593		5.21212	26.8535	36.8109	1.18132	9.51607	2.58406	63.9135	2.7458	4.69465	0.576455	2.83474	0.693448	0.211011	0.581588	0.328592	0.235127	0.232743	0.117889	0.626839	0.351564
13.10.15	2	S19_25.80m_19C	64.1653	296.68	533.797	20.433	182.412	30.7259	647.464	45.6891	90.6155	9.65375	32.6638	6.50167	1.99132	4.9316	3.88332	2.02032	1.91857	1.43674	15.4556	5.00231		9.48557	52.3075	48.9165	1.74568	19.2449	3.9187	55.7426	4.96798	10.1949	0.835791	2.84763	1.04686	0.277542	0.742576	0.416853	0.200607	0.25351	0.117356	1.113	0.487452
13.10.15	2	S19_25.80m_19C	64.0334	283.113	554.723	19.7106	182.325	26.9701	613.952	43.2864	88.3342	9.09124	32.5626	5.81514	2.02887	4.52068	4.20982	1.9258	1.7611	1.47009	15.4711	5.5706		10.5049	38.2598	60.9362	1.85903	13.0189	3.103	66.2624	3.97898	11.2643	1.00398	3.26257	0.850597	0.288897	0.721431	0.675587	0.220275	0.30684	0.145695	1.09633	0.847692
13.10.15	2	S19_25.80m_21C	60.2708	253.551	501.937	19.6081	188.287	31.3174	650.408	46.1409	90.5226	9.59667	33.4343	5.53804	2.09883	5.12537	3.70585	1.93998	1.74889	1.42539	15.032	5.27032		5.04358	20.3964	38.3049	1.06787	14.2689	2.85241	85.4907	4.21283	9.7691	0.953176	3.0103	0.605635	0.253485	0.614986	0.535354	0.234882	0.225462	0.08868	1.19767	0.544911
13.10.15	3	S19_25.80m_14B	73.4265	343.956	369.161	27.9747	326.092	48.8558	340.275	66.1206	122.544	13.6282	44.8442	8.96562	1.70389	6.89272	5.31875	2.93714	2.45879	2.42249	29.8101	10.6457		6.1595	31.5509	25.2932	1.58177	28.1243	5.20697	24.7185	5.92625	7.3838	1.07576	5.17354	0.840834	0.281523	1.12733	0.396568	0.433311	0.347765	0.191271	1.84544	0.842141
13.10.15	Intermediate/mixed	S19_25.80m_17C	41.0401	340.988	200.082	28.4406	335.502	52.6359	120.482	65.0296	134.547	13.1914	46.9995	8.57467	1.52802	6.29222	5.1607	2.68564	2.60811	2.41797	28.8513	10.2499		5.23248	58.921	23.8381	2.12303	30.5122	6.58851	10.639	5.81175	15.8044	1.19571	3.67762	0.837919	0.21064	0.896871	0.505262	0.417767	0.322344	0.172564	2.37285	1.06934
12.10.15	1	CF132_4A	35.7829	364.4	138.777	32.3251	395.02	60.2768	24.9181	78.1552	153.299	15.128	51.1987	9.33777	1.64849	7.43226	6.03025	3.22583	3.43082	2.89005	32.8812	11.5567		3.71919	28.9948	12.8135	1.38746	24.5004	6.38376	2.69197	5.23279	14.8878	1.17409	3.74356	0.887398	0.236612	0.794494	0.566642	0.437526	0.437747	0.200707	1.43882	0.725687
12.10.15	1	CF132_7A	29.8811	368.634	130.83	27.3462	331.382	60.8647	34.5959	63.5644	137.343	12.5805	45.9711	7.67752	1.7479	5.60597	4.89449	3.40458	3.57889	2.45537	27.603	9.83212		3.40759	47.6205	15.1345	3.79317	28.9229	7.54672	10.2134	6.73021	20.8944	1.55448	6.37423	1.49309	0.281467	1.19305	0.988435	1.20488	0.755502	0.378573	2.67701	1.20076
12.10.15	1	CF132_10B	34.4705	378.758	138.066	34.1383	417.344	66.0228	26.4638	78.1965	154.185	16.2157	52.8552	9.03912	1.7465	7.06311	6.44602	3.71336	3.54255	2.86243	33.5588	11.7508		3.18198	55.8629	12.5969	3.24545	36.8797	6.38927	3.30725	5.04665	14.3217	1.64654	4.21943	1.11138	0.305666	0.801024	0.703165	0.390729	0.447178	0.214514	1.64285	1.06656
12.10.15	1	CF132_10B	36.2361	341.227	128.285	30.1006	382.227	55.2398	26.7008	70.7617	137.411	13.5866	48.0296	8.61289	1.7219	7.13606	5.74328	3.18456	3.64278	2.89109	31.258	10.7978		4.01571	36.0979	10.7769	2.67354	34.1908	5.98819	2.31125	4.06411	8.90381	0.970108	4.3315	1.0378	0.246642	0.723716	0.540856	0.315149	0.407258	0.265061	2.66629	0.912936
12.10.15	1	CF132_14B	33.6471	358.942	128.473	30.2336	369.684	55.4022	23.5593	69.8614	137.946	14.1778	48.7842	8.79916	1.61448	6.78708	4.73491	3.13235	2.77401	2.54352	31.1334	10.7448		3.72624	40.516	11.5022	2.05845	30.7609	5.40532	2.81408	4.60058	12.3332	1.23926	4.3957	1.3009	0.233968	0.934031	0.639562	0.374932	0.449087	0.18617	2.16279	1.04502
12.10.15	1	CF132_15B	33.4026	381.366	146.13	32.9427	398.313	59.0005	27.1256	74.5669	146.396	15.0874	52.4118	9.63829	1.87669	7.29926	6.02431	3.213	3.24878	2.79319	34.2351	11.7617		2.91591	43.4539	17.713	2.01896	29.336	4.89204	3.47407	3.87647	12.0001	1.30145	4.5823	1.43176	0.239285	0.860349	0.642146	0.280912	0.319011	0.244545	2.18887	0.9873
12.10.15	1	CF132_16B	37.4454	359.229	176.486	30.932	374.322	57.0086	47.3981	70.4256	142.359	14.4061	49.2417	9.70176	1.70328	7.64337	5.64765	2.99736	3.54073	2.79824	31.3053	11.6337		4.66909	44.7846	11.5996	1.73501	22.3829	4.77605	4.83507	3.51878	13.228	1.21151	4.21774	1.22727	0.223919	0.834359	0.487399	0.318472	0.316634	0.214327	1.63538	0.877869
12.10.15	1	CF132_16B	34.5684	351.174	167.203	31.3723	380.741	58.9319	42.1952	71.4587	138.803	14.1044	52.0721	9.22639	1.75396	7.02965	6.30781	3.21358	3.08097	2.61202	31.8685	10.9134		3.02113	36.4505	9.99346	1.76921	20.9701	5.19195	3.15905	4.91838	9.36045	0.801318	4.1729	1.07325	0.224408	0.919605	0.642328	0.358168	0.326806	0.148873	2.16853	0.766705
12.10.15	1	CF132_19C	31.3571	331.363	157.999	29.6475	360.327	57.3206	35.1397	68.9178	137.039	13.6077	45.8664	8.60834	1.71429	6.7037	5.33839	3.04689	-	2.54491	29.9008	10.7008		2.95876	29.7043	13.8208	2.55576	27.9179	4.82157	3.6894	4.65459	10.8214	1.22241	4.90719	1.40911	0.292702	1.05146	0.589076	0.365209	0.361098	0.228642	2.48093	1.248
12.10.15	2	CF132_6A	67.9703	280.343	574.041	19.0999	172.969	30.2595	830.112	45.9702	81.525	9.29453	31.6052	5.78407	1.91029	4.04427	3.86273	1.82485	-	1.299	13.3802	4.56015		4.65965	25.9656	52.1637	1.64589	9.72428	4.51718	64.0323	3.14502	8.38782	0.781453	2.51837	0.93518	0.276318	0.531154	0.475364	0.404258	0.363276	0.112585	0.801518	0.498577
12.10.15	1	CF131_2A	49.1092	373.316	253.909	30.8124	369.714	64.4451	201.089	80.5419	148.821	15.0858	53.0739	8.89403	1.84312	6.88294	5.94064	3.64492	3.21146	2.92506	33.9188	12.0529		5.38193	53.1634	17.3704	2.20532	26.5362	6.36853	22.2617	7.12716	15.3013	1.14955	3.40973	1.22702	0.276134	0.997671	0.636128	0.47142	0.497716	0.236699	2.45635	1.19699
12.10.15	1	CF131_3A	47.0844	360.115	207.311	28.3911	346.941	62.9131	146.924	69.024	138.131	13.8502	52.3102	7.17659	1.46633	5.74461	5.31032	2.61767	2.64262	2.66283	30.0494	11.7853		4.41495	53.4364	15.1795	2.5892	28.6933	7.84924	16.2255	5.10195	14.1201	1.28645	4.15148	0.947127	0.214332	0.667457	0.681336	0.242581	0.48594	0.344067	2.55112	2.44143
12.10.15	1	CF131_4A	36.8885	336.833	146.573	27.6613	339.119	58.4959	63.1196	70.8044	132.427	13.6548	47.3375	8.29123	1.17621	5.89457	5.09528	2.74948	2.52163	2.63204	29.3623	10.1627		5.20059	46.0623	13.6958	2.26641	19.3535	3.41132	8.83804	6.93595	15.8602	1.02633	3.59961	1.18481	0.210258	0.892705	0.579559	0.493246	0.319738	0.236153	1.87241	1.23596
12.10.15	1	CF131_11B	26.8433	297.175	113.48	30.5828	360.03	57.5127	14.6688	73.2096	131.982	13.9274	47.9013	8.93807	1.46292	7.05683	5.71386	3.22756	2.99001	2.71773	32.8229	11.0314		2.73003	19.9235	8.74088	1.67351	20.4055	3.92766	1.49192	5.26653	9.4811	0.659621	2.15328	1.07733	0.185558	0.861781	0.592543	0.351125	0.292146	0.173608	1.7322	0.776285
12.10.15	1	CF131_15C	53.0678	340.34	200.59	27.3994	327.105	58.5972	207.53	67.0067	129.411	13.2895	45.0746	8.16037	1.45479	7.48723	5.32693	2.41985	2.49905	2.65717	30.623	10.682		4.85943	46.4235	18.9862	1.82157	26.5819	4.17522	28.0516	6.34576	13.1053	1.54414	3.85714	1.14717	0.271487	1.23395	0.728197	0.360085	0.250298	0.212748	2.9603	1.15497
12.10.15	1	CF131_16C	51.2248	353.166	159.789	28.3845	347.51	57.9355	200.174	70.2886	141.061	13.5189	46.3587	9.49965	1.94415	7.36143	5.49601	2.72846	2.91098	2.76213	29.8015	11.0596		6.32664	25.6983	17.7148	2.06253	27.5347	7.19254	37.2199	6.12913	17.4565	0.950578	4.16895	1.13987	0.289618	1.15185	0.602333	0.327601	0.516372	0.388584	3.26267	1.42534
12.10.15	1	CF131_19D	36.6897	351.581	157.013	28.1612	359.891	55.241	56.4981	66.7541	133.382	13.3408	47.0888	9.01555	1.73223	6.95991	5.24321	2.74408	3.33608	2.68806	30.1759	10.7549		4.48849	23.775	10.1448	2.5381	33.2382	5.3664	6.79971	4.88111	13.6663	1.0492	4.09752	1.20703	0.30657	1.16446	0.542729	0.418454	0.39971	0.227416	2.71286	1.07452
12.10.15	1	CF131_22D	29.5018	351.076	115.536	30.2307	370.417	59.2324	17.5641	72.5262	139.722	13.7194	47.6271	8.52018	1.55984	6.77289	5.60502	3.04621	3.37006	2.72864	31.6258	11.6894		4.43604	42.5097	12.1368	2.05152	30.8846	6.274	2.43076	5.32788	12.9821	0.96784	3.65073	1.03949	0.228871	0.76653	0.630424	0.279584	0.577096	0.234304	1.96157	0.933211
12.10.15	1	CF131_23D	34.9478	336.976	221.29	28.6605	359.651	56.2592	91.3924	68.0892	130.89	13.4924	45.2923	8.17767	1.79161	6.44016	5.11265	2.99328	2.95651	2.68675	30.5453	10.2938		4.04442	24.5697	17.7817	2.39623	36.4743	6.83801	10.309	4.729	14.4476	1.12687	5.14978	1.20452	0.170888	0.944208	0.582632	0.386634	0.401626	0.19851	2.68589	1.09573
12.10.15	1	CF131_30E	32.2652	367.8	136.814	34.6078	417.22	67.3547	24.9954	82.3497	165.261	15.8862	55.6778	10.9114	1.70051	8.52691	6.67609	3.29434	3.51025	2.8034	33.0618	11.827		4.3633	32.2514	13.1984	2.45741	36.7947	7.38704	2.53856	6.78605	17.0235	1.24191	4.56939	1.47662	0.178517	1.06746	0.525905	0.310694	0.479735	0.233512	1.97566	1.10162
12.10.15	3	CF131_6A	65.8683	349.666	305.392	27.9496	329.609	59.1925	289.308	68.9771	130.047	13.4947	49.9907	8.04202	1.54515	6.83255	4.91553	2.91844	2.70493	2.60312	28.5187	10.2708		6.54844	34.199	18.1611	1.63224	23.6253	7.13809	24.4179	4.2662	11.0118	1.019	4.3768	0.979846	0.214576	0.796755	0.539998	0.434163	0.381031	0.242593	1.89195	0.816354
12.10.15	3	CF131_6A	57.3399	352.454	292.404	28.0125	339.775	59.2405	260.225	69.5581	132.728	13.8408	47.6342	7.63457	1.62194	6.13044	4.86556	2.79058	2.94422	2.48198	28.6353	10.5738		6.16404	52.2664	19.6192	1.94556	23.9361	6.5352	20.9213	5.69051	14.779	1.29359	3.41686	1.04816	0.268781	0.645011	0.654244	0.404909	0.426654	0.200592	1.9704	0.837682
12.10.15	3	CF131_10B	50.2443	337.638	265.221	28.9338	359.087	58.4097	244.31	73.5157	133.238	14.0167	49.3021	8.2477	1.80436	6.15619	5.26228	2.94248	2.86139	2.59318	31.0609	10.0572		3.96089	30.5944	22.8019	1.86277	23.97	6.09028	22.1706	4.64304	11.6988	0.942906	4.18857	1.20077	0.190582	0.737863	0.543664	0.292658	0.356986	0.216065	1.9407	0.808799
12.10.15	3	CF131_10B	50.4249	317.966	261.147	27.7608	327.938	54.5108	237.873	68.1656	127.012	13.7645	48.2019	8.99328	1.50447	6.49913	5.19559	2.48544	2.84801	2.53583	29.2017	10.4286		5.48087	24.4905	19.4086	1.69677	22.3026	4.26226	18.9234	3.46468	10.4357	0.752256	3.06513	0.692552	0.165799	0.72782	0.447488	0.280823	0.299244	0.276721	1.48815	0.839283
12.10.15	3	CF131_13C	70.667	332.727	330.276	28.8593	336.194	56.8217	313.821	69.3427	131.023	14.5199	50.1855	9.35778	1.73321	6.39252	5.7144	3.24978	-	2.81521	29.9374	10.623		7.32283	32.7527	26.4446	1.99051	25.3234	6.31063	32.6307	3.89456	13.6144	0.901241	3.54172	1.15316	0.229779	0.767954	0.698666	0.467171	0.308239	0.302287	1.77602	0.983742
12.10.15	3	CF131_13C	118.848	285.838	276.322	39.5043	342.398	50.2124	256.527	65.3535	134.209	16.0966	62.4768	11.7102	2.68041	11.1049	8.45609	3.865	3.2884	2.55216	26.0535	9.12154		25.7584	35.3784	32.7516	4.6561	23.9027	6.45261	39.6467	5.98348	11.356	2.04929	5.32857	2.18277	0.679619	2.00604	1.32882	0.588154	0.423633	0.206723	2.7781	1.1202
12.10.15	3	CF131_17C	67.3259	332.047	300.888	27.9143	341.119	57.0403	312.782	64.0364	129.892	13.2634	44.3392	7.43766	1.63404	5.57845	5.16326	2.23469	2.54462	2.56621	28.6682	10.3278		6.46874	23.871	23.9719	1.93137	30.8541	4.49169	30.8417	4.54334	12.8752	0.797806	5.02407	0.907978	0.241218	0.762542	0.608451	0.342066	0.34744	0.264387	2.38387	0.948387
12.10.15	3	CF131_17C	55.8349	317.231	276.335	28.511	346.144	53.5902	263.127	66.5447	126.89	13.9193	46.9388	9.09544	1.61787	7.10795	5.29892	2.82333	2.90794	2.60074	31.1003	10.8545		5.65659	22.7111	26.6365	1.95442	34.9785	5.79971	28.0395	5.21855	13.1267	1.02574	3.52658	1.13511	0.240338	0.804202	0.470649	0.336042	0.394142	0.212549	2.86144	1.06717
12.10.15	Intermediate/mixing	CF131_1a	52.116	327.457	280.953	24.0318	272.962	48.1747	172.044	59.5898	106.515	11.105	39.6438	7.38049	1.56075	5.65918	4.91291	2.29632	-	2.08097	23.5049	9.05074		6.33711	36.7623	26.1797	1.99819	18.3658	5.16151	21.4102	5.25177	11.2256	0.918078	3.29201	1.0698	0.227007	0.835274	0.699395	0.385283	0.421081	0.21857	2.40471	0.87178
12.10.15	Intermediate/mixing	CF131_20D	55.0138	343.103	297.843	26.5749	317.983	56.1234	278.347	65.88	134.027	12.9985	43.403	8.88121	1.82753	6.01262	4.55706	2.76138	2.66372	2.53691	27.3703	9.87809		6.86798	57.6639	34.4486	2.27211	28.6188	4.31183	42.5696	7.03177	15.4275	1.10219	4.52008	1.28127	0.15389	0.811918	0.562822	0.337185	0.311791	0.265223	2.69883	1.25447
27.04.17	1	CF129_AH3_1	31.6134	374.004	114.795	34.6592	414.86	62.2815	15.5441	75.8301	147.039	14.1578	51.8838	9.27396	1.5124	7.11038	6.76379	3.30838	3.43441	3.12983	34.134	11.9417		1.57542	8.19217	3.57095	1.57542	17.8547	2.52067	1.26033	3.46592	5.56648	0.661675	2.73072	0.703687	0.126033	0.682681	0.388603	0.304581	0.26257	0.178547	1.47039	0.441117
27.04.17	1	CF129_AH3_3	32.3486	368.438	113.535	33.924	397.845	60.391	18.1698	75.62	150.4	14.8614	53.4592	9.00089	1.61743	7.48848	6.16513	3.46592	3.31888	3.06681	35.3209	11.7106		1.26033	9.34748	4.30614	1.57542	9.24245	2.52067	1.05028	2.83575	4.72625	0.535642	2.83575	0.955753	0.210056	0.56715	0.346592	0.273072	0.3781	0.18905	0.945251	0.630167
27.04.17	1	CF129_AH3_4	32.1385	354.679	129.499	31.7184	398.371	58.1854	118.681	70.7888	140.527	13.328	48.8379	7.27843	1.5229	7.1524	5.76603	3.31888	3.10882	3.0248	32.5586	10.4398		2.10056	7.66703	6.09161	1.26033	9.34748	2.10056	31.5084	3.04581	5.6715	0.724692	2.52067	0.735195	0.157542	0.703687	0.514636	0.388603	0.336089	0.18905	1.15531	0.535642
27.04.17	Intermediate/mixing	CF129_AH3_6	51.1486	316.974	255.218	25.4798	277.589	42.1162	140.107	53.9843	104.398	10.1772	32.8737	5.34592	1.21832	5.06234	4.70525	2.43665	2.58368	1.98503	21.2156	7.541		2.73072	8.82234	14.7039	1.02927	10.1877	2.41564	7.562	1.05028	4.09609	0.294078	2.20558	0.966256	0.157542	0.588156	0.619664	0.346592	0.56715	0.26257	1.15531	0.651173
27.04.17	2	CF129_AH3_7	67.743	283.47	578.703	21.1211	197.872	33.0838	697.385	47.5776	92.3195	9.23195	36.1296	6.55374	1.94302	5.2934	4.1486	2.20558	2.16357	1.60693	14.8194	5.18838		2.10056	5.77653	13.6536	0.82972	7.562	1.36536	22.0558	1.47039	3.36089	0.441117	1.57542	0.724692	0.147039	0.441117	0.304581	0.241564	0.18905	0.115531	0.766703	0.283575
27.04.17	1	CF129_AH3_8	31.9285	372.114	118.892	32.3486	390.704	61.8614	23.3162	73.2044	146.409	14.4518	52.3039	9.36848	1.57542	7.47798	6.23865	3.08782	3.3924	3.16134	33.5039	10.8809		1.05028	9.03239	4.83128	1.15531	11.5531	1.8905	1.36536	2.73072	5.04134	0.609161	2.20558	0.861228	0.210056	1.00827	0.514636	0.26257	0.304581	0.178547	1.57542	0.514636
27.04.17	1	CF129_AH3_11	31.2983	351.423	119.942	33.1993	395.955	61.2312	14.6934	75.41	151.03	14.5359	53.8793	9.99865	1.79598	7.99262	6.16513	3.54994	3.26637	3.05631	32.7687	10.9544		1.15531	8.71731	3.67597	1.01877	14.7039	2.10056	0.955753	2.83575	5.88156	0.661675	2.31061	0.714189	0.210056	0.577653	0.462122	0.336089	0.556648	0.178547	1.47039	0.630167
27.04.17	1	CF129_AH3_12	33.6089	373.899	84.6524	35.3944	415.91	63.6469	13.3175	76.4603	156.386	15.103	56.1899	10.0092	1.5229	8.42323	6.66927	3.71799	3.18234	3.23486	35.2894	11.8997		1.78547	11.5531	4.93631	1.47039	13.6536	2.41564	1.03978	3.46592	5.88156	0.682681	3.25586	1.02927	0.147039	0.714189	0.588156	0.315084	0.325586	0.220558	1.36536	0.745698
27.04.17	1	CF129_8Blarge	30.9832	368.648	117.736	35.2894	439.016	60.6011	16.6889	81.5016	149.35	14.2628	50.9385	10.2717	1.48089	8.70681	6.73228	3.61296	3.69698	3.19285	36.7597	11.5636		1.68045	27.3072	6.51173	1.36536	25.2067	3.781	0.787709	5.04134	3.88603	0.966256	2.94078	0.871731	0.168045	0.924245	0.861228	0.483128	0.588156	0.315084	2.52067	0.892737
27.04.17	1	CF129_8Bsmall	46.5273	348.692	243.665	27.5173	342.391	55.0346	190.31	64.8022	132.335	12.9604	45.372	7.81407	1.82748	6.74279	5.70301	2.70972	2.6257	2.83575	30.5631	9.31597		1.68045	17.8547	11.5531	0.976759	14.7039	1.99553	7.98212	2.83575	5.14636	0.703687	2.10056	0.724692	0.220558	0.693184	0.504134	0.3781	0.409609	0.294078	1.36536	0.64067
27.04.17	1	CF129_8Bsmall_1	54.2994	343.441	233.057	31.5084	367.597	55.9798	171.09	73.6245	147.249	14.9035	54.6145	9.45251	1.91151	7.76156	6.53273	3.4134	2.68871	2.95128	32.6637	10.3137		3.04581	15.7542	6.61675	1.8905	15.7542	2.52067	8.2972	4.41117	7.35195	0.861228	2.41564	1.15531	0.210056	0.913742	0.577653	0.357095	0.493631	0.220558	1.47039	0.609161
27.04.17	1	CF129_9B	28.3575	324.536	109.544	29.996	359.195	56.0849	15.124	68.1631	136.431	13.3175	45.8972	9.09541	1.54391	6.94234	5.37743	3.31888	2.88827	3.0038	31.1933	11.0279		2.83575	18.905	3.781	0.955753	13.6536	2.6257	1.26033	2.10056	5.46145	0.609161	2.31061	0.976759	0.18905	0.703687	0.682681	0.336089	0.525139	0.220558	1.78547	0.819217
27.04.17	1	CF129_9B_1	28.1475	362.346	108.914	32.149	376.735	60.9161	14.4938	74.0446	144.308	14.3153	53.6692	9.41049	1.40737	7.11038	5.56648	3.52894	3.37139	3.20335	35.3944	11.5846		1.36536	10.1877	4.20111	0.997764	9.97764	1.8905	0.850726	2.94078	4.30614	0.598659	2.41564	0.882234	0.126033	0.724692	0.388603	0.336089	0.346592	0.178547	1.47039	0.787709
27.04.17	1	CF129_17C	31.1933	345.542	139.267	30.143	353.944	59.5508	34.4491	72.7843	140.107	13.4856	48.8379	8.61228	1.65944	6.12312	5.51396	3.35039	2.88827	3.04581	31.6134	11.1435		2.10056	13.6536	4.93631	1.57542	13.6536	2.83575	1.68045	3.04581	5.14636	0.766703	2.52067	1.15531	0.157542	0.871731	0.735195	0.525139	0.651173	0.304581	1.8905	0.777206
27.04.17	1	CF129_17C_1	32.0335	347.642	149.665	29.7229	362.346	56.1899	34.5542	74.7798	145.148	13.9372	47.0525	10.0617	1.54391	6.85832	6.12312	3.44491	3.31888	3.12983	32.0335	10.7128		1.78547	11.5531	4.93631	1.05028	13.6536	2.41564	1.8905	3.36089	4.62122	0.819217	3.15084	0.966256	0.157542	0.672178	0.535642	0.399106	0.388603	0.283575	1.57542	0.672178
27.04.17	1	CF129_17C_2	31.8234	362.136	140.212	31.1933	359.195	56.3999	28.2525	70.6837	138.847	14.4623	48.943	8.92737	1.56491	6.70078	5.45094	3.0038	3.36089	2.93028	32.0335	10.9649		2.31061	8.19217	4.72625	1.05028	11.5531	1.99553	1.15531	1.99553	3.46592	0.861228	3.46592	1.05028	0.178547	0.504134	0.693184	0.325586	0.630167	0.241564	1.26033	0.661675
27.04.17	1	CF129_18C	30.9832	353.944	118.051	33.819	401.206	61.0212	15.9117	79.296	154.601	15.8067	54.9296	9.97764	1.64894	7.63552	6.4277	3.61296	3.42391	3.31888	36.3396	12.0992		2.6257	11.5531	3.99106	1.47039	15.7542	3.25586	0.82972	3.25586	8.61228	0.955753	3.25586	0.798212	0.220558	0.525139	0.535642	0.357095	0.462122	0.241564	1.8905	0.934748
27.04.17	1	CF129_18C_1	30.038	352.894	119.312	34.3441	413.81	60.0759	16.6994	77.5105	159.222	15.8592	53.2491	9.66256	1.58592	8.61228	7.05787	3.26637	3.72849	3.3819	36.2346	12.1202		2.20558	17.8547	4.20111	2.41564	23.1061	3.88603	1.26033	4.72625	9.13742	1.15531	4.20111	1.26033	0.18905	1.05028	0.892737	0.493631	0.546145	0.367597	2.41564	0.808714
27.04.17	1	CF129_18C_2	28.6726	344.491	124.878	34.3441	434.815	58.2905	15.7542	77.0904	157.227	15.4391	58.2905	10.8179	1.64894	7.64603	6.75329	3.35039	3.83352	3.18234	37.705	12.4878		2.10056	14.7039	8.50726	1.8905	24.1564	3.36089	1.26033	4.20111	8.82234	1.15531	2.31061	1.05028	0.210056	0.924245	0.598659	0.231061	0.630167	0.241564	2.20558	0.808714

## Sheet: LA-ICP-MS.Stds Dublin 
LA-ICP-MS	Date	Standard	Sample	Rb	Sr	Y	Zr	Nb	Ba	La	Ce	Pr	Nd	Sm	Eu	Gd	Dy	Er	Yb		Ta	Th	U
		ATHO1-G Preffered Values		65.3	94.1	94.5	512	62.4	547	55.6	121	14.6	60.9	14.2	2.76	15.3	16.2	10.3	10.5		3.9	7.4	2.37
Trinity College Dublin	12.10.15	ATHO1G	CF131/132	67.278	94.1306	82.7883	469.676	61.8934	552.345	56.0364	126.134	14.4585	55.7986	13.0998	2.65691	13.5753	15.298	9.16052	9.76835		3.22908	6.79951	2.32514
Trinity College Dublin	12.10.15	ATHO1G	CF131/132	63.3785	97.9434	83.0487	452.738	63.9726	543.562	55.3325	123.799	15.3737	62.5968	13.983	2.69276	13.284	15.0046	8.76587	8.73389		3.67163	6.78683	2.26151
Trinity College Dublin	13.10.15	ATHO1G	S-19-25.80-22.90	69.6675	102.516	94.2425	501.087	62.5408	551.712	58.0282	128.059	15.4785	64.439	14.0047	2.92394	16.2213	17.6195	10.766	10.3492		3.53358	7.7084	2.56517
Trinity College Dublin	13.10.15	ATHO1G	S-19-25.80-22.90	59.2479	89.8938	87.4984	477.983	56.1749	558.184	55.3996	120.308	14.7836	58.3749	13.8972	2.81563	13.2131	15.4938	9.54531	10.3226		3.32048	7.47177	2.51242
Trinity College Dublin	27.04.17	ATHO1G	CF129	60.181	95.5753	92.4245	513.586	59.8659	589.206	56.3999	129.079	15.4391	65.1173	16.2793	2.83575	13.9687	16.5944	10.8914	10.2297		3.80201	7.22592	2.05855
Trinity College Dublin	27.04.17	ATHO1G_1	CF129	70.6837	106.183	94.5251	503.083	63.4368	567.15	59.8659	133.805	14.7039	65.0122	15.4391	2.81475	15.124	16.3843	10.5343	10.3242		3.83352	7.89809	2.51017
Trinity College Dublin	27.04.17	ATHO1G_2	CF129	61.7564	98.9362	87.3832	486.279	60.7061	540.893	55.0346	138.637	15.3341	59.5508	13.7586	3.35039	18.8	18.1698	5.99709	8.82234		3.4134	7.88759	2.42614
			AVERAGE	64.599	97.8827	88.8444	486.347	61.2272	557.579	56.5853	128.546	15.0816	61.5557	14.3517	2.87002	14.8838	16.3664	9.38007	9.79291		3.54338	7.39687	2.37987
			2*STDEV	9.2237	10.7921	9.94784	42.5584	5.30656	32.954	3.51757	12.2808	0.838303	7.36253	2.20303	0.460207	4.08928	2.39891	3.40924	1.4439		0.471152	0.949702	0.357096
			% Bias	-1.07353	4.01986	-5.98477	-5.01027	-1.87947	1.93402	1.77213	6.23623	3.29885	1.07661	1.06815	3.98617	-2.72046	1.02688	-8.9314	-6.73421		-9.14399	-0.0422585	0.416461
		StHs6/80-G Preffered values		30.7	482	11.4	118	6.94	298	12	26.1	3.2	13	2.78	0.953	2.59	2.22	1.18	1.13		0.42	2.28	1.01
Trinity College Dublin	12.10.15	SthS	CF131/132	28.2532	492.503	10.8227	118.203	6.79917	313.601	12.9852	25.0972	3.2148	12.5003	2.88376	0.952792	2.89778	2.20146	1.04496	<LOD		0.377854	2.32557	1.12832
Trinity College Dublin	12.10.15	SthS	CF131/132	28.8816	525.401	11.5321	122.629	7.02846	325.218	12.6785	27.1079	3.13315	12.1951	3.07518	0.959998	2.52356	1.89504	1.06771	<LOD		0.338063	2.20778	1.06934
Trinity College Dublin	13.10.15	StHs	S-19-25.80-22.90	34.5217	489.197	11.5362	113.65	7.03504	305.544	12.4773	26.547	3.27956	13.3203	2.89057	<LOD	2.72983	2.25026	1.19262	1.30019		0.388652	2.43237	1.11697
Trinity College Dublin	13.10.15	StHs	S-19-25.80-22.90	28.2658	476.242	11.427	114.855	6.08731	290.393	11.6413	26.016	2.96203	12.0911	2.93719	0.968843	2.51347	2.08107	1.12461	1.15911		0.383718	2.05117	1.05149
Trinity College Dublin	27.04.17	StHs	CF129	30.7732	479.977	11.3745	118.366	6.52223	317.604	11.9627	25.3117	2.84625	12.8134	3.08782	0.83077	2.2791	2.22659	1.33385	1.08179		0.397005	2.39463	1.06078
Trinity College Dublin	27.04.17	StHs_1	CF129	29.6179	487.329	11.2275	115.951	6.57474	310.882	12.0992	27.0972	2.97229	12.3933	<LOD	0.798212	2.67821	2.06905	1.1238	1.21832		0.416961	2.13207	0.903239
Trinity College Dublin	27.04.17	StHs_2	CF129	31.8234	512.536	11.196	116.161	6.61675	307.732	10.8914	27.1077	3.0248	12.4458	2.55218	0.966256	2.61519	2.6572	0.976759	1.27084		0.363396	2.05855	0.945251
			AVERAGE	30.3052	494.741	11.3023	117.117	6.66624	310.139	12.1051	26.3264	3.06184	12.537	2.90445	0.912812	2.60531	2.19724	1.12347	1.20605		0.380807	2.22888	1.03934
			2*STDEV	4.55862	35.6609	0.500144	5.91793	0.659093	21.7934	1.40246	1.73218	0.307371	0.831097	0.388394	0.154103	0.389858	0.473648	0.230712	0.175655		0.0501887	0.314794	0.168972
			% Bias	-1.28586	2.64333	-0.8571	-0.748715	-3.9446	4.07357	0.875673	0.867352	-4.3175	-3.56124	4.47661	-4.21701	0.591002	-1.02528	-4.79031	6.72987		-9.33168	-2.24225	2.90499
Standard data from analyses of comparison samples (Albert et al., 2015)
				Rb	Sr	Y	Zr	Nb	Ba	La	Ce	Pr	Nd	Sm	Eu	Gd	Dy	Er	Yb	Lu	Ta	Th	U
	Date	micron spot		65.3	94.1	94.5	512	62.4	547	55.6	121	14.6	60.9	14.2	2.76	15.3	16.2	10.3	10.5	1.54	3.9	7.4	2.37
		Standard	Sample Run
RHUL	27.05.11	ATHO1	Y-3 (M5/4/-12)	65.8928	92.3639	88.9715	488.668	57.4987	549.02	55.1789	122.629	14.3509	60.4152	14.8988	2.46304	13.8304	16.5335	10.14	9.74598	1.46116	3.61838	7.3034	2.27838
RHUL	15.12.11	ATHO1	Y-3 (M5/4/-12)	66.5142	94.6822	91.1644	494.818	57.497	553.886	54.8321	121.717	14.4074	60.1257	14.4982	2.49739	14.0089	16.6407	10.3962	10.3779	1.49655	3.71958	7.5573	2.26843
RHUL	27.05.11	ATH01	Y-3 (M5/4/-12)	70.5838	96.3101	89.1683	508.202	61.3655	569.624	57.5458	126.547	14.644	66.0301	14.7711	2.37988	14.5773	16.1744	10.1961	10.36	1.51607	3.86214	7.43704	2.50847
RHUL	26.11.08	ATHO1	CE1 Tephra	63.0682	93.1907	89.1648	488.972	57.1597	540.026	54.5145	120.594	14.1785	59.7698	13.9201	2.48021	14.2476	16.3836	10.2091	10.2932	1.492	3.62499	7.2717	2.25173
RHUL	03.10.11	ATHO1	RH0334_TP_9.70	65.9564	93.2965	89.1625	490.903	57.8089	552.868	55.4261	122.815	14.5492	61.0388	14.0093	2.48388	13.9451	16.0378	9.78781	10.2105	1.46796	3.59992	7.21594	2.38673
RHUL	20.02.12	ATHO1	PRAD 1332	70.286	96.0129	92.5699	498.859	60.0625	556.505	57.2735	123.314	14.4439	63.2639	14.308	2.45692	14.4921	16.6927	10.3065	10.1901	1.4973	3.69428	7.39894	2.37103
RHUL	19.06.13	ATHO1	RH0334_TP_9.70	69.9907	89.2058	86.1253	500.979	54.9033	555.567	56.174	131.281	14.4092	60.9643	14.9929	<LOD	15.1486	17.5377	9.54843	10.5334	-	3.6641	7.89742	2.4651
			Average	67.4703	93.5803	89.4752	495.915	58.0422	553.928	55.8493	124.128	14.4262	61.6583	14.4855	2.46088	14.3214	16.5715	10.0834	10.2444	1.48851	3.68334	7.44025	2.36141
			Bias	2.1703	-0.519686	-5.02478	-16.0854	-4.35777	6.92795	0.249276	3.12821	-0.173833	0.758258	0.285479	-0.299118	-0.978592	0.371494	-0.216566	-0.255555	-0.051492	-0.216658	0.0402485	-0.00858914
			2 std	5.71826	4.86017	4.0162	14.4299	4.19564	17.7794	2.3744	7.30075	0.295009	4.47335	0.851627	0.0839771	0.918206	0.977187	0.607106	0.496388	0.040829	0.179551	0.46323	0.20113
			% Bias	3.32359	-0.55227	-5.31723	-3.14168	-6.9836	1.26654	0.448339	2.5853	-1.19064	1.24509	2.01042	-10.8376	-6.39603	2.29318	-2.10259	-2.43386	-3.34364	-5.55533	0.543898	-0.362411
			RSD	4.23761	2.59679	2.24431	1.45487	3.6143	1.60484	2.12572	2.94081	1.02248	3.62754	2.93959	1.7067	3.20571	2.9484	3.01041	2.42272	1.37147	2.43733	3.113	4.25869
		StHs6/80-G Preffered values		30.7	482	11.4	118	6.94	298	12	26.1	3.2	13	2.78	0.953	2.59	2.22	1.18	1.13	0.168	0.42	2.28	1.01
RHUL	27.05.11	StHs6/80-G	Y-3 (M25/4-12)	30.2841	473.23	10.4753	112.436	6.43622	288.877	11.5989	25.2099	2.99948	12.0743	2.68145	0.855994	2.63115	2.17627	1.15694	1.02655	0.159211	0.382695	2.11935	0.899868
RHUL	27.05.11	StHs6/80-G	Y-3 (M25/4-12)	28.8868	460.926	11.1978	113.614	6.22054	289.542	11.0746	26.2508	3.23386	12.4777	2.95094	0.926749	2.95513	2.14436	1.38233	1.10252	0.197713	0.516044	2.32531	0.956644
RHUL	15.12.11	StHs6/80-G	Y-3 (M25/4-12)	30.4228	474.255	10.8345	113.967	6.4999	291.458	11.171	24.7187	2.95848	12.352	2.64534	0.825332	2.47195	2.11511	1.17261	1.09188	0.154808	0.385775	2.2216	0.972452
RHUL	15.12.11	StHs6/80-G	Y-3 (M25/4-12)	30.6078	469.258	10.8544	111.212	6.12167	291.216	11.244	24.7394	2.93827	11.9832	2.73278	0.925827	2.16584	2.06542	1.13482	1.03567	0.158713	0.39799	2.14449	0.950728
RHUL	26.11.08	StHs6/80-G	SMP1-e Tephra	29.9093	473.631	10.7258	111.67	6.27818	288.737	11.2639	23.8379	2.90648	12.3293	2.45514	0.876402	2.35519	2.08206	1.21156	1.0819	0.158134	0.391063	2.12758	0.94749
RHUL	26.11.08	StHs6/80-G	CE1 Tephra	29.8129	467.438	10.4655	111.392	6.23701	285.587	11.3966	24.1331	2.87638	11.6598	2.59959	0.885578	2.57569	1.97096	1.07099	1.02932	0.145012	0.394933	2.15033	0.929626
RHUL	03.10.11	StHs6/80-G	RH0334_TP_9.70	31.7287	467.759	10.6745	111.469	6.47298	301.113	11.8743	25.7948	2.9777	13.2122	2.7474	0.864323	2.65411	2.12907	1.10436	1.07173	0.152433	0.39738	2.17623	0.867924
RHUL	03.10.11	StHs6/80-G	RH0334_TP_9.70	31.5928	484.465	11.0563	117.492	6.24972	300.757	11.9069	25.7336	3.13804	12.0013	2.8931	1.00557	2.94379	2.11287	1.2041	1.15775	0.191187	0.401303	2.27093	1.07469
RHUL	03.10.11	StHs6/80-G	RH0334_TP_9.70	31.4287	479.961	10.5782	116.247	6.47269	297.842	11.8121	24.947	2.8976	13.0135	3.04087	0.937843	2.65767	2.3299	1.0711	1.26278	0.173525	0.447356	2.11654	0.999612
RHUL	20.02.12	StHs6/80-G	PRAD 1332	31.3957	478.978	10.3884	115.757	5.92703	298.836	11.9955	24.2461	2.98433	12.3755	3.38113	0.961583	3.13103	2.06003	1.15116	1.26567	0.226715	0.464608	2.23526	0.922683
RHUL	20.02.12	StHs6/80-G	PRAD 1332	30.4922	472.513	10.9822	109.894	6.12083	290.002	11.0284	24.251	2.78697	12.7517	3.76738	0.889732	2.5153	2.4613	1.20524	1.37394	0.277694	0.463679	2.20336	0.95809
RHUL	19.06.13	StHs6/80-G	RH0334_TP_9.70	31.9459	498.2	9.98442	116.697	7.92442	334.904	12.3926	26.9859	3.41901	13.3549	<LOD	<LOD	<LOD	<LOD	<LOD	<LOD	-	<LOD	2.1111	1.10314
			Average	30.709	475.051	10.6848	113.487	6.41343	296.573	11.5632	25.0707	3.00972	12.4654	2.89956	0.904994	2.64153	2.14976	1.16956	1.13634	0.181377	0.422075	2.18351	0.965245
			Bias	0.00898858	-6.94892	-0.715218	-4.51292	-0.526567	-1.42739	-0.436764	-1.02931	-0.190284	-0.53456	0.119558	-0.0480064	0.0515309	-0.0702394	-0.0104352	0.0063378	0.0133769	0.00207507	-0.0964934	-0.044755
			2 Std	1.85108	19.2652	0.667246	5.05629	1.01245	26.3052	0.863548	1.91103	0.348687	1.04806	0.763761	0.104177	0.561124	0.271991	0.173063	0.231105	0.0804204	0.0876299	0.137405	0.134437
			% Bias	0.0292788	-1.44168	-6.27384	-3.82451	-7.58742	-0.47899	-3.6397	-3.94372	-5.94639	-4.112	4.30065	-5.0374	1.98961	-3.16394	-0.884338	0.560867	7.96241	0.494065	-4.23217	-4.43119
			RSD	3.01391	2.0277	3.12241	2.2277	7.89317	4.43487	3.73402	3.81128	5.7927	4.20387	13.1703	5.75569	10.6212	6.32608	7.39862	10.1689	22.1694	10.3808	3.14643	6.96387

## Sheet: EMP.Rome S-19 Post-CI-Pre-NYT 
Point #1	SiO2	TiO2	Al2O3	FeO	MnO	MgO	CaO	Na2O	K2O	P2O5	F	Cl	SO2
5 S19-18,5	58.911	0.358	17.483	2.577	0.18	0.406	1.992	3.967	7.853	0.029	0.237	0.57	0.046	94.609
6 S19-18,5	59.185	0.415	17.505	2.839	0.084	0.403	2.001	4.109	7.863	0.039	0	0.584	0.036	95.063
8 S19-18,5	61.455	0.427	17.979	2.61	0.126	0.385	2.025	4.705	7.964	0	0.265	0.597	0.029	98.567
9 S19-18,5	61.632	0.396	18.187	2.669	0.09	0.402	2.09	4.522	8.115	0.079	0.256	0.632	0.008	99.078
0 S19-18,5	61.999	0.377	18.354	2.637	0.102	0.364	2.033	4.589	8.219	0.064	0.171	0.562	0.048	99.519
0 S19=18,5	60.654	0.402	18.351	2.252	0.15	0.293	1.984	4.419	8.41	0.061	0.124	0.462	0.048	97.61
1 S19=18,5	61.243	0.329	18.936	1.663	0.069	0.18	2.09	3.72	9.156	0.043	0	0.237	0.021	97.687
2 S19=18,5	59.647	0.406	18.013	2.692	0.192	0.382	1.946	4.387	7.864	0.075	0.312	0.536	0.052	96.504
3 S19=18,5	60.912	0.441	18.332	2.757	0.207	0.435	2.075	4.598	8.368	0	0.161	0.599	0.017	98.902
1 S19-18,1	59.404	0.375	17.22	2.354	0.114	0.386	1.934	4.38	7.668	0.09	0.133	0.564	0.069	94.691
3 S19=18,1	59.863	0.48	18.825	3.175	0.123	0.564	2.994	3.038	8.654	0.235	0.182	0.332	0.048	98.513
4 S19=18,1	59.175	0.485	18.747	4.211	0.132	0.764	3.693	3.576	7.556	0.285	0.264	0.47	0.027	99.385
5 S19=18,1	56.978	0.401	17.173	2.312	0.198	0.4	1.836	4.374	7.605	0.111	0.18	0.563	0.13	92.261
6 S19=18,1	60.693	0.379	18.121	2.619	0.105	0.394	1.983	4.338	8.209	0.097	0.284	0.581	0.111	97.914
7 S19=18,1	59.628	0.394	17.658	2.719	0.159	0.422	2.028	4.295	7.953	0.043	0.275	0.618	0.048	96.24
8 S19=18,1	59.704	0.403	18.007	2.643	0.141	0.398	2.013	4.303	7.963	0.072	0.18	0.627	0.046	96.5
S19=17,9	60.283	0.348	19.739	2.503	0.033	0.502	3.353	2.763	8.946	0.175	0.145	0.039	0.086	98.915
S19=17,9	57.939	0.525	17.776	4.68	0.168	1.271	4.527	2.623	8.505	0.212	0.076	0.169	0.004	98.475
S19=17,9	60.262	0.404	18.865	2.765	0.045	0.626	3.329	2.982	8.87	0.178	0.077	0.144	0.05	98.597
S19=17,9	60.045	0.492	18.125	2.596	0.165	0.398	2.122	4.081	8.01	0.014	0.294	0.568	0.123	97.033
S19=17,9	59.813	0.371	17.924	2.696	0.228	0.415	2.085	4.206	7.914	0.089	0.161	0.576	0.071	96.549
S19=17,9	60.051	0.408	17.838	2.433	0.138	0.425	1.983	4.553	7.7	0.039	0.104	0.535	0.107	96.314
S19=17,9	59.189	0.483	18.111	4.464	0.165	0.985	2.756	3.393	8.514	0.224	0.273	0.108	0.065	98.73
S19=17,9	59.931	0.499	18.967	3.24	0.201	0.575	3.074	3.598	8.41	0.164	0	0.106	0.05	98.815
0 S19=17,9	60.176	0.453	18.87	2.928	0.153	0.62	1.46	4.815	9.295	0.182	0.386	0.391	0.015	99.744
1 S19=17,9	57.796	6.545	18.223	3.69	0.207	0.87	3.029	4.606	7.988	0	0.456	0.347	0.097	103.854
2 S19=17,9	58.585	0.514	18.057	3.717	0.156	0.906	2.986	3.637	8.027	0.15	0.246	0.312	0.094	97.387
2 S19-17,9	59.299	0.425	19.087	3.228	0.171	0.299	2.341	2.59	9.134	0.2	0	0.314	0.044	97.132
3 S19-17,9	57.836	0.593	17.716	4.284	0.246	0.788	2.718	3.669	8.359	0.177	0.132	0.626	0.05	97.194
S19-16,8	61.52	0.403	18.328	3.085	0.198	0.511	2.233	4.771	8.335	0.054	0.123	0.617	0.094	100.272
6 S19-16,8	61.123	0.492	18.426	2.873	0.12	0.469	2.302	4.551	8.206	0.096	0.189	0.63	0.031	99.508
7 S19-16,8	59.683	0.46	17.826	2.882	0.135	0.47	2.208	4.108	8.101	0.079	0.369	0.586	0.038	96.945
8 S19-16,8	56.569	0.397	17.818	3.676	0.153	0.723	2.864	3.399	8.875	0.099	0.152	0.578	0.056	95.359
9 S19-16,8	63.421	0.324	18.858	1.155	0	0.088	1.61	3.831	9.336	0.065	0	0.055	0.103	98.846
0 S19-16,8	62.055	0.452	18.179	2.636	0.234	0.343	1.81	5.504	7.352	0.068	0.17	0.679	0.036	99.518
1 S19-16,8	60.373	0.44	17.619	2.568	0.144	0.289	1.947	4.788	7.12	0.029	0.17	0.703	0.113	96.303
2 S19-16,8	60.89	0.287	18.201	1.856	0.157	0.238	2.011	4.258	7.938	0	0.2	0.524	0.017	96.577
3 S19-16,8	61.889	0.389	17.824	2.278	0.217	0.258	1.853	4.635	7.988	0.086	0.304	0.531	0.046	98.298
4 S19-16,8	62.449	0.36	18.211	1.656	0.108	0.225	1.786	4.196	8.313	0	0.201	0.426	0.052	97.983
